# Supplementary material
Source: PubMed Central journal article supplement (PMC5790932)
Supplement: JVI.01463-17_zjv004183282s1.pdf [file JVI.01463-17_zjv004183282s1.pdf]

**Suppl. Table 1.** Summary of lipid abundancy data obtained in this study for HCoV-229E-infected Huh-7 cells.

| Lipid <sup>a</sup> | Mock (n = 8) |          | UV-inactivated HCoV-229E (n = 8) |          | Py-2 treated (n = 8) |          | Infected (n = 7) |          | Infected and Py-2 treated (n = 8) |          | Lipid <sup>a</sup> | Mock vs. UV-HCoV-229E                     | Mock vs. UV-HCoV-229E | Mock vs. Py-2 treated                     | Mock vs. Py-2 treated | Mock vs. Infected                         | Mock vs. Infected  | Infected vs. Infected and treated         | Infected vs. Infected and treated |
|--------------------|--------------|----------|----------------------------------|----------|----------------------|----------|------------------|----------|-----------------------------------|----------|--------------------|-------------------------------------------|-----------------------|-------------------------------------------|-----------------------|-------------------------------------------|--------------------|-------------------------------------------|-----------------------------------|
|                    | AV           | SEM      | AV                               | SEM      | AV                   | SEM      | AV               | SEM      | AV                                | SEM      |                    | log <sub>2</sub> fold change <sup>b</sup> | TTEST <sup>c</sup>    | log <sub>2</sub> fold change <sup>b</sup> | TTEST <sup>c</sup>    | log <sub>2</sub> fold change <sup>b</sup> | TTEST <sup>c</sup> | log <sub>2</sub> fold change <sup>b</sup> | TTEST <sup>c</sup>                |
| Cholesterol        | 3,57E+01     | 8,32E+00 | 3,19E+01                         | 9,98E+00 | 3,03E+01             | 9,89E+00 | 3,74E+01         | 4,90E+00 | 3,31E+01                          | 5,21E+00 | Cholesterol        | -0,163                                    | 4,20E-01              | 0,240                                     | 2,52E-01              | 0,066                                     | 6,49E-01           | -0,175                                    | 1,28E-01                          |
| SM [32:1;0]        | 1,20E-01     | 1,13E-02 | 1,04E-01                         | 2,31E-02 | 1,03E-01             | 2,46E-02 | 1,36E-01         | 2,09E-02 | 1,21E-01                          | 1,50E-02 | SM [32:1;0]        | -0,212                                    | 9,29E-02              | 0,224                                     | 9,34E-02              | 0,180                                     | 8,32E-02           | -0,174                                    | 1,21E-01                          |
| SM [32:0;0]        | 5,97E-02     | 7,13E-03 | 4,88E-02                         | 1,28E-02 | 4,73E-02             | 1,24E-02 | 5,88E-02         | 1,22E-02 | 5,25E-02                          | 8,85E-03 | SM [32:0;0]        | -0,291                                    | 5,41E-02              | -0,336                                    | <b>2,81E-02</b>       | -0,023                                    | 8,54E-01           | -0,164                                    | 2,68E-01                          |
| SM [33:1;0]        | 8,69E-02     | 1,38E-02 | 8,36E-02                         | 1,56E-02 | 7,62E-02             | 2,10E-02 | 9,83E-02         | 1,65E-02 | 9,32E-02                          | 7,45E-03 | SM [33:1;0]        | -0,056                                    | 6,59E-01              | -0,190                                    | 2,47E-01              | 0,177                                     | 1,71E-01           | -0,076                                    | 4,50E-01                          |
| SM [33:0;0]        | 1,56E-02     | 7,03E-03 | 1,62E-02                         | 5,03E-03 | 1,26E-02             | 6,55E-03 | 1,53E-02         | 5,80E-03 | 1,63E-02                          | 7,22E-03 | SM [33:0;0]        | 0,057                                     | 8,42E-01              | -0,301                                    | 4,03E-01              | -0,022                                    | 9,46E-01           | 0,086                                     | 7,87E-01                          |
| SM [34:2;0]        | 1,25E-01     | 1,88E-02 | 1,08E-01                         | 2,02E-02 | 1,11E-01             | 1,90E-02 | 1,46E-01         | 2,07E-02 | 1,16E-01                          | 2,16E-02 | SM [34:2;0]        | -0,210                                    | 1,05E-01              | -0,171                                    | 1,63E-01              | 0,224                                     | 6,06E-02           | -0,325                                    | <b>1,89E-02</b>                   |
| SM [34:1;0]        | 1,22E+00     | 1,31E-01 | 1,02E+00                         | 2,10E-01 | 1,07E+00             | 1,54E-01 | 1,30E+00         | 1,80E-01 | 1,14E+00                          | 1,68E-01 | SM [34:1;0]        | -0,268                                    | <b>3,23E-02</b>       | -0,196                                    | <b>4,64E-02</b>       | 0,085                                     | 3,74E-01           | -0,188                                    | 9,98E-02                          |
| SM [34:0;0]        | 3,12E-01     | 3,02E-02 | 2,81E-01                         | 5,79E-02 | 2,58E-01             | 3,78E-02 | 3,13E-01         | 4,45E-02 | 2,65E-01                          | 3,11E-02 | SM [34:0;0]        | -0,154                                    | 1,92E-01              | -0,275                                    | <b>6,88E-03</b>       | 0,001                                     | 9,88E-01           | -0,238                                    | <b>3,08E-02</b>                   |
| SM [35:0;0]        | 5,01E-03     | 2,56E-03 | 5,82E-03                         | 1,76E-03 | 4,39E-03             | 2,65E-03 | 5,36E-03         | 2,20E-03 | 5,41E-03                          | 2,14E-03 | SM [35:0;0]        | 0,215                                     | 4,98E-01              | -0,191                                    | 6,41E-01              | 0,097                                     | 7,83E-01           | 0,013                                     | 9,66E-01                          |
| SM [36:1;0]        | 1,01E-01     | 8,26E-03 | 1,00E-01                         | 1,60E-02 | 8,31E-02             | 2,09E-02 | 1,14E-01         | 1,30E-02 | 9,39E-02                          | 8,45E-03 | SM [36:1;0]        | -0,013                                    | 8,91E-01              | -0,281                                    | <b>4,06E-02</b>       | 0,170                                     | <b>4,01E-02</b>    | -0,276                                    | <b>3,57E-03</b>                   |
| SM [36:0;0]        | 2,28E-02     | 3,86E-03 | 2,31E-02                         | 4,98E-03 | 1,52E-02             | 6,16E-03 | 2,31E-02         | 3,95E-03 | 1,68E-02                          | 5,41E-03 | SM [36:0;0]        | 0,020                                     | 8,88E-01              | <b>-0,589</b>                             | <b>1,00E-02</b>       | 0,015                                     | 9,05E-01           | -0,461                                    | <b>2,46E-02</b>                   |
| SM [37:1;0]        | 3,96E-03     | 2,48E-03 | 6,70E-03                         | 2,35E-03 | 4,30E-03             | 3,37E-03 | 4,48E-03         | 3,07E-03 | 6,84E-03                          | 3,49E-03 | SM [37:1;0]        | <b>0,759</b>                              | <b>4,75E-02</b>       | 0,121                                     | 8,23E-01              | 0,180                                     | 7,19E-01           | <b>0,609</b>                              | 2,43E-01                          |
| SM [38:2;0]        | 1,37E-02     | 5,22E-03 | 1,59E-02                         | 4,55E-03 | 1,13E-02             | 6,12E-03 | 1,49E-02         | 5,51E-03 | 1,45E-02                          | 5,86E-03 | SM [38:2;0]        | 0,210                                     | 3,96E-01              | -0,275                                    | 4,17E-01              | 0,119                                     | 6,77E-01           | -0,039                                    | 8,96E-01                          |
| SM [38:1;0]        | 5,40E-02     | 1,07E-02 | 5,64E-02                         | 1,15E-02 | 3,94E-02             | 1,67E-02 | 5,59E-02         | 1,63E-02 | 4,86E-02                          | 1,48E-02 | SM [38:1;0]        | 0,062                                     | 6,78E-01              | -0,456                                    | 5,57E-02              | 0,048                                     | 8,00E-01           | -0,200                                    | 3,85E-01                          |
| SM [38:0;0]        | 6,94E-03     | 3,24E-03 | 9,17E-03                         | 2,54E-03 | 5,68E-03             | 3,84E-03 | 5,97E-03         | 3,64E-03 | 5,68E-03                          | 4,20E-03 | SM [38:0;0]        | 0,402                                     | 1,48E-01              | -0,289                                    | 5,18E-01              | -0,219                                    | 5,91E-01           | -0,070                                    | 8,95E-01                          |
| SM [39:2;0]        | 5,26E-03     | 3,59E-03 | 4,36E-03                         | 2,77E-03 | 3,58E-03             | 2,72E-03 | 4,06E-03         | 2,48E-03 | 6,50E-03                          | 3,53E-03 | SM [39:2;0]        | -0,271                                    | 6,74E-01              | <b>-0,555</b>                             | 4,54E-01              | -0,374                                    | 6,20E-01           | <b>0,679</b>                              | 2,82E-01                          |
| SM [39:1;0]        | 1,64E-02     | 1,04E-02 | 2,35E-02                         | 7,54E-03 | 1,11E-02             | 1,00E-02 | 1,71E-02         | 1,02E-02 | 1,84E-02                          | 1,05E-02 | SM [39:1;0]        | <b>0,517</b>                              | 1,42E-01              | <b>-0,565</b>                             | 3,15E-01              | 0,059                                     | 8,99E-01           | 0,100                                     | 8,23E-01                          |
| SM [40:3;0]        | 7,47E-03     | 3,54E-03 | 8,53E-03                         | 3,40E-03 | 6,15E-03             | 3,78E-03 | 7,20E-03         | 3,61E-03 | 7,87E-03                          | 4,98E-03 | SM [40:3;0]        | 0,192                                     | 5,50E-01              | -0,281                                    | 4,83E-01              | -0,052                                    | 8,88E-01           | 0,129                                     | 7,72E-01                          |
| SM [40:2;0]        | 1,29E-01     | 2,31E-02 | 1,35E-01                         | 2,85E-02 | 1,04E-01             | 3,82E-02 | 1,38E-01         | 3,41E-02 | 1,29E-01                          | 2,69E-02 | SM [40:2;0]        | 0,059                                     | 6,85E-01              | -0,315                                    | 1,31E-01              | 0,088                                     | 5,94E-01           | -0,089                                    | 6,10E-01                          |
| SM [40:1;0]        | 2,26E-01     | 2,64E-02 | 2,43E-01                         | 4,31E-02 | 1,73E-01             | 5,25E-02 | 2,31E-01         | 4,74E-02 | 2,03E-01                          | 4,35E-02 | SM [40:1;0]        | 0,108                                     | 3,44E-01              | -0,388                                    | <b>2,26E-02</b>       | 0,035                                     | 7,78E-01           | -0,190                                    | 2,46E-01                          |
| SM [40:0;0]        | 2,19E-02     | 3,89E-03 | 2,59E-02                         | 7,32E-03 | 1,45E-02             | 5,46E-03 | 1,89E-02         | 5,87E-03 | 1,42E-02                          | 6,52E-03 | SM [40:0;0]        | 0,240                                     | 1,98E-01              | <b>-0,597</b>                             | <b>7,35E-03</b>       | -0,209                                    | 2,65E-01           | -0,418                                    | 1,63E-01                          |
| SM [41:3;0]        | 5,00E-03     | 2,84E-03 | 5,62E-03                         | 1,58E-03 | 3,47E-03             | 2,75E-03 | 4,79E-03         | 3,13E-03 | 6,06E-03                          | 2,89E-03 | SM [41:3;0]        | 0,168                                     | 6,05E-01              | <b>-0,527</b>                             | 4,07E-01              | -0,062                                    | 9,01E-01           | 0,340                                     | 4,82E-01                          |

|                |          |          |          |          |          |          |          |          |          |          |                |        |          |        |          |        |          |        |          |
|----------------|----------|----------|----------|----------|----------|----------|----------|----------|----------|----------|----------------|--------|----------|--------|----------|--------|----------|--------|----------|
| SM [41:2;0]    | 7,01E-02 | 1,74E-02 | 7,99E-02 | 1,77E-02 | 5,70E-02 | 2,39E-02 | 7,80E-02 | 1,98E-02 | 7,19E-02 | 1,96E-02 | SM [41:2;0]    | 0,188  | 2,84E-01 | -0,297 | 2,31E-01 | 0,155  | 4,22E-01 | -0,118 | 5,57E-01 |
| SM [41:1;0]    | 7,32E-02 | 1,13E-02 | 8,68E-02 | 1,78E-02 | 6,08E-02 | 1,96E-02 | 7,74E-02 | 1,60E-02 | 7,23E-02 | 1,52E-02 | SM [41:1;0]    | 0,247  | 8,90E-02 | -0,266 | 1,46E-01 | 0,081  | 5,59E-01 | -0,098 | 5,38E-01 |
| SM [42:3;0]    | 1,43E-01 | 1,37E-02 | 1,36E-01 | 2,22E-02 | 1,10E-01 | 2,90E-01 | 1,49E-01 | 2,35E-02 | 1,21E-01 | 1,62E-02 | SM [42:3;0]    | -0,078 | 4,27E-01 | -0,374 | 1,20E-02 | 0,058  | 5,61E-01 | -0,297 | 1,86E-02 |
| SM [42:2;0]    | 5,75E-01 | 6,24E-02 | 5,51E-01 | 9,54E-02 | 4,49E-01 | 1,01E-01 | 5,80E-01 | 1,23E-01 | 4,94E-01 | 7,38E-02 | SM [42:2;0]    | -0,062 | 5,58E-01 | -0,356 | 9,54E-03 | 0,012  | 9,22E-01 | -0,231 | 1,21E-01 |
| SM [42:1;0]    | 3,11E-01 | 4,71E-02 | 3,19E-01 | 6,13E-01 | 2,52E-01 | 4,25E-01 | 3,12E-01 | 6,14E-02 | 2,64E-01 | 3,79E-02 | SM [42:1;0]    | 0,034  | 7,87E-01 | -0,305 | 1,92E-02 | 0,005  | 9,68E-01 | -0,242 | 8,51E-02 |
| SM [43:3;0]    | 9,84E-03 | 3,80E-03 | 1,16E-02 | 3,36E-03 | 5,75E-03 | 3,79E-03 | 9,29E-03 | 4,67E-03 | 8,84E-03 | 3,48E-03 | SM [43:3;0]    | 0,232  | 3,55E-01 | -0,775 | 4,89E-02 | -0,084 | 8,04E-01 | -0,072 | 8,33E-01 |
| SM [43:2;0]    | 4,77E-02 | 7,49E-03 | 5,17E-02 | 1,08E-02 | 3,73E-02 | 1,28E-02 | 4,86E-02 | 1,05E-02 | 4,68E-02 | 1,08E-02 | SM [43:2;0]    | 0,116  | 4,06E-01 | -0,354 | 6,77E-02 | 0,025  | 8,59E-01 | -0,054 | 7,51E-01 |
| SM [43:1;0]    | 2,07E-02 | 2,65E-03 | 2,35E-02 | 6,62E-03 | 1,53E-02 | 3,00E-03 | 1,82E-02 | 5,74E-03 | 1,78E-02 | 6,01E-03 | SM [43:1;0]    | 0,188  | 2,73E-01 | -0,430 | 2,09E-03 | -0,187 | 2,84E-01 | -0,026 | 9,17E-01 |
| SM [44:3;0]    | 2,16E-02 | 4,77E-03 | 2,04E-02 | 5,22E-03 | 1,19E-02 | 5,87E-03 | 1,86E-02 | 9,88E-03 | 1,51E-02 | 7,18E-03 | SM [44:3;0]    | -0,082 | 6,43E-01 | -0,864 | 2,72E-03 | -0,213 | 4,63E-01 | -0,300 | 4,43E-01 |
| SM [44:2;0]    | 3,45E-02 | 5,39E-03 | 3,19E-02 | 6,61E-03 | 2,19E-02 | 9,37E-03 | 3,01E-02 | 1,40E-02 | 2,52E-02 | 9,13E-03 | SM [44:2;0]    | -0,117 | 3,89E-01 | -0,659 | 5,14E-03 | -0,200 | 4,17E-01 | -0,257 | 4,30E-01 |
| DAG [30:1]     | 5,23E-02 | 1,55E-02 | 5,19E-02 | 1,06E-02 | 2,26E-02 | 1,16E-02 | 6,27E-02 | 1,42E-02 | 3,22E-02 | 8,79E-03 | DAG [30:1]     | -0,011 | 9,53E-01 | -1,212 | 6,76E-04 | 0,261  | 2,02E-01 | -0,962 | 2,10E-04 |
| DAG [32:2]     | 1,20E-01 | 3,92E-02 | 1,08E-01 | 2,28E-02 | 6,10E-02 | 2,37E-02 | 1,43E-01 | 2,78E-02 | 7,91E-02 | 1,50E-02 | DAG [32:2]     | -0,144 | 4,91E-01 | -0,973 | 2,76E-03 | 0,260  | 2,08E-01 | -0,858 | 7,61E-05 |
| DAG [32:1]     | 1,98E-01 | 5,19E-02 | 1,92E-01 | 4,17E-02 | 1,09E-01 | 4,29E-02 | 2,41E-01 | 4,10E-02 | 1,35E-01 | 2,33E-02 | DAG [32:1]     | -0,045 | 8,02E-01 | -0,855 | 2,31E-03 | 0,283  | 1,03E-01 | -0,833 | 3,02E-05 |
| DAG [34:3]     | 7,00E-02 | 1,58E-02 | 6,19E-02 | 1,58E-02 | 3,40E-02 | 1,20E-02 | 8,52E-02 | 1,51E-02 | 4,81E-02 | 9,03E-03 | DAG [34:3]     | -0,176 | 3,24E-01 | -1,039 | 1,54E-04 | 0,285  | 7,87E-02 | -0,826 | 5,45E-05 |
| DAG [34:2]     | 2,73E-01 | 8,83E-02 | 2,36E-01 | 5,34E-01 | 1,78E-01 | 7,18E-01 | 3,34E-01 | 4,31E-02 | 2,13E-01 | 3,07E-02 | DAG [34:2]     | -0,211 | 3,25E-01 | -0,617 | 3,30E-02 | 0,287  | 1,26E-01 | -0,649 | 2,66E-05 |
| DAG [34:1]     | 2,18E-01 | 6,69E-02 | 1,88E-01 | 4,15E-02 | 1,44E-01 | 5,43E-01 | 2,67E-01 | 3,58E-02 | 1,64E-01 | 2,57E-02 | DAG [34:1]     | -0,211 | 3,05E-01 | -0,599 | 2,91E-02 | 0,293  | 1,07E-01 | -0,702 | 2,13E-05 |
| DAG [36:3]     | 9,66E-02 | 2,23E-02 | 7,90E-02 | 2,01E-02 | 6,64E-02 | 2,25E-02 | 1,22E-01 | 1,21E-02 | 7,70E-02 | 1,28E-02 | DAG [36:3]     | -0,291 | 1,19E-01 | -0,541 | 1,73E-02 | 0,332  | 2,05E-02 | -0,660 | 1,08E-05 |
| DAG [36:2]     | 1,78E-01 | 5,58E-02 | 1,42E-01 | 3,41E-02 | 1,35E-01 | 5,12E-02 | 2,15E-01 | 2,46E-02 | 1,51E-01 | 2,57E-02 | DAG [36:2]     | -0,325 | 1,43E-01 | -0,400 | 1,29E-01 | 0,274  | 1,27E-01 | -0,509 | 2,86E-04 |
| DAG [38:4]     | 3,48E-02 | 1,03E-02 | 2,71E-02 | 7,10E-03 | 2,33E-02 | 8,80E-03 | 4,38E-02 | 1,01E-02 | 2,73E-02 | 6,47E-03 | DAG [38:4]     | -0,362 | 1,02E-01 | -0,577 | 3,08E-02 | 0,332  | 1,12E-01 | -0,684 | 2,08E-03 |
| DAG [38:3]     | 3,93E-02 | 1,06E-02 | 2,47E-02 | 7,02E-03 | 2,51E-02 | 1,10E-02 | 4,22E-02 | 5,52E-03 | 2,71E-02 | 4,28E-03 | DAG [38:3]     | -0,674 | 5,57E-03 | -0,650 | 1,90E-02 | 0,102  | 5,28E-01 | -0,638 | 4,74E-05 |
| Cer[16:1/18;0] | 1,06E-03 | 5,66E-04 | 9,07E-04 | 6,36E-04 | 2,07E-03 | 1,22E-03 | 1,53E-03 | 1,23E-03 | 2,83E-03 | 1,04E-03 | Cer[16:1/18;0] | -0,219 | 6,78E-01 | 0,969  | 1,14E-01 | 0,539  | 4,41E-01 | 0,883  | 4,58E-02 |
| Cer[18:1/16;0] | 5,03E-02 | 2,52E-02 | 4,27E-02 | 2,04E-02 | 1,19E-01 | 4,26E-02 | 9,28E-02 | 5,05E-02 | 1,37E-01 | 3,67E-02 | Cer[18:1/16;0] | -0,237 | 5,17E-01 | 1,240  | 1,56E-03 | 0,883  | 5,51E-02 | 0,566  | 6,95E-02 |
| Cer[18:2/22;0] | 2,62E-03 | 1,28E-03 | 3,05E-03 | 1,44E-03 | 4,35E-03 | 2,26E-03 | 5,76E-03 | 1,89E-03 | 6,43E-03 | 2,30E-03 | Cer[18:2/22;0] | 0,219  | 5,38E-01 | 0,733  | 8,04E-02 | 1,138  | 2,10E-03 | 0,158  | 5,54E-01 |
| Cer[16:1/24;0] | 3,65E-03 | 1,91E-03 | 3,61E-03 | 1,89E-03 | 5,41E-03 | 2,49E-03 | 6,49E-03 | 2,05E-03 | 7,76E-03 | 2,79E-03 | Cer[16:1/24;0] | -0,015 | 9,70E-01 | 0,567  | 1,35E-01 | 0,832  | 1,56E-02 | 0,257  | 3,41E-01 |
| Cer[18:1/22;0] | 1,57E-02 | 6,17E-03 | 1,56E-02 | 5,51E-03 | 2,28E-02 | 9,89E-03 | 2,70E-02 | 7,00E-03 | 3,14E-02 | 1,01E-02 | Cer[18:1/22;0] | -0,006 | 9,82E-01 | 0,538  | 1,07E-01 | 0,783  | 5,44E-03 | 0,216  | 3,57E-01 |
| Cer[18:1/22;0] | 1,25E-03 | 5,30E-04 | 1,07E-03 | 4,22E-04 | 1,75E-03 | 1,27E-03 | 1,60E-03 | 8,32E-04 | 2,33E-03 | 9,83E-04 | Cer[18:1/22;0] | -0,224 | 4,92E-01 | 0,483  | 3,90E-01 | 0,358  | 4,03E-01 | 0,539  | 1,71E-01 |

|                  |          |          |          |          |          |          |          |          |          |          |                  |        |          |        |          |       |          |        |          |
|------------------|----------|----------|----------|----------|----------|----------|----------|----------|----------|----------|------------------|--------|----------|--------|----------|-------|----------|--------|----------|
| Cer[18:2/24:0;0] | 1,20E-02 | 5,08E-03 | 1,23E-02 | 4,42E-03 | 1,56E-02 | 6,10E-03 | 2,20E-02 | 5,53E-03 | 2,21E-02 | 4,32E-03 | Cer[18:2/24:0;0] | 0,036  | 9,00E-01 | 0,384  | 2,14E-01 | 0,878 | 2,85E-03 | 0,003  | 9,85E-01 |
| Cer[18:1/24:0;0] | 4,60E-02 | 1,43E-02 | 4,39E-02 | 1,42E-02 | 5,91E-02 | 1,92E-02 | 7,88E-02 | 1,19E-02 | 7,85E-02 | 1,33E-02 | Cer[18:1/24:0;0] | -0,065 | 7,82E-01 | 0,362  | 1,44E-01 | 0,778 | 3,56E-04 | -0,005 | 9,70E-01 |
| TAG [44:3]       | 9,88E-03 | 1,66E-03 | 1,01E-02 | 3,69E-03 | 1,17E-02 | 4,16E-03 | 1,53E-02 | 5,98E-03 | 2,16E-02 | 7,79E-03 | TAG [44:3]       | 0,031  | 8,82E-01 | 0,243  | 2,72E-01 | 0,631 | 2,82E-02 | 0,495  | 1,08E-01 |
| TAG [44:2]       | 6,98E-02 | 1,53E-02 | 6,62E-02 | 1,85E-02 | 7,26E-02 | 2,39E-02 | 9,20E-02 | 3,18E-02 | 1,02E-01 | 2,88E-02 | TAG [44:2]       | -0,077 | 6,76E-01 | 0,056  | 7,85E-01 | 0,398 | 1,01E-01 | 0,155  | 5,17E-01 |
| TAG [44:1]       | 9,08E-02 | 2,28E-02 | 9,81E-02 | 2,75E-02 | 1,06E-01 | 3,35E-02 | 1,26E-01 | 4,70E-02 | 1,30E-01 | 3,02E-02 | TAG [44:1]       | 0,112  | 5,72E-01 | 0,230  | 2,92E-01 | 0,467 | 8,54E-02 | 0,050  | 8,30E-01 |
| TAG [44:0]       | 3,21E-02 | 8,17E-03 | 4,01E-02 | 1,40E-02 | 3,98E-02 | 1,22E-02 | 4,54E-02 | 1,81E-02 | 4,41E-02 | 9,79E-03 | TAG [44:0]       | 0,323  | 1,81E-01 | 0,312  | 1,59E-01 | 0,500 | 8,26E-02 | -0,043 | 8,60E-01 |
| TAG [45:1]       | 3,29E-02 | 1,80E-02 | 4,66E-02 | 1,56E-02 | 4,03E-02 | 2,04E-02 | 5,25E-02 | 2,53E-02 | 5,26E-02 | 1,84E-02 | TAG [45:1]       | 0,504  | 1,24E-01 | 0,295  | 4,51E-01 | 0,674 | 1,05E-01 | 0,005  | 9,87E-01 |
| TAG [46:3]       | 1,37E-01 | 3,01E-02 | 1,28E-01 | 3,72E-02 | 1,22E-01 | 4,03E-02 | 1,75E-01 | 5,02E-02 | 1,68E-01 | 3,89E-02 | TAG [46:3]       | -0,094 | 6,18E-01 | -0,169 | 4,09E-01 | 0,359 | 8,94E-02 | -0,066 | 7,39E-01 |
| TAG [46:2]       | 4,29E-01 | 1,01E-01 | 4,26E-01 | 1,22E-01 | 4,25E-01 | 1,44E-01 | 5,40E-01 | 1,75E-01 | 5,23E-01 | 1,15E-01 | TAG [46:2]       | -0,009 | 9,64E-01 | -0,014 | 9,49E-01 | 0,333 | 1,50E-01 | -0,045 | 8,28E-01 |
| TAG [46:1]       | 4,06E-01 | 9,92E-02 | 4,39E-01 | 1,43E-01 | 4,48E-01 | 1,58E-01 | 5,23E-01 | 1,92E-01 | 5,11E-01 | 1,23E-01 | TAG [46:1]       | 0,110  | 6,07E-01 | 0,139  | 5,42E-01 | 0,363 | 1,55E-01 | -0,033 | 8,88E-01 |
| TAG [46:0]       | 9,50E-02 | 2,54E-02 | 1,13E-01 | 4,18E-02 | 1,07E-01 | 3,86E-02 | 1,27E-01 | 4,71E-02 | 1,17E-01 | 2,77E-02 | TAG [46:0]       | 0,257  | 3,03E-01 | 0,177  | 4,59E-01 | 0,425 | 1,13E-01 | -0,122 | 6,06E-01 |
| TAG [47:3]       | 3,17E-02 | 1,49E-02 | 4,08E-02 | 1,16E-02 | 3,01E-02 | 1,55E-02 | 4,59E-02 | 2,14E-02 | 4,81E-02 | 1,59E-02 | TAG [47:3]       | 0,366  | 1,92E-01 | -0,075 | 8,36E-01 | 0,536 | 1,53E-01 | 0,066  | 8,28E-01 |
| TAG [47:2]       | 1,13E-01 | 5,06E-02 | 1,40E-01 | 4,57E-02 | 1,24E-01 | 5,96E-02 | 1,64E-01 | 7,53E-02 | 1,59E-01 | 5,08E-02 | TAG [47:2]       | 0,299  | 2,97E-01 | 0,134  | 6,96E-01 | 0,528 | 1,49E-01 | -0,044 | 8,83E-01 |
| TAG [47:1]       | 1,24E-01 | 5,95E-02 | 1,58E-01 | 6,14E-02 | 1,52E-01 | 7,93E-02 | 1,83E-01 | 9,63E-02 | 1,72E-01 | 6,37E-02 | TAG [47:1]       | 0,353  | 2,76E-01 | 0,300  | 4,30E-01 | 0,568 | 1,67E-01 | -0,092 | 7,90E-01 |
| TAG [47:0]       | 3,04E-02 | 1,66E-02 | 4,36E-02 | 1,87E-02 | 3,98E-02 | 2,11E-02 | 5,07E-02 | 2,71E-02 | 4,47E-02 | 1,67E-02 | TAG [47:0]       | 0,521  | 1,58E-01 | 0,391  | 3,36E-01 | 0,739 | 9,90E-02 | -0,181 | 6,10E-01 |
| TAG [48:3]       | 8,06E-01 | 1,71E-01 | 7,46E-01 | 2,13E-01 | 7,38E-01 | 2,54E-01 | 9,93E-01 | 3,16E-01 | 8,85E-01 | 1,84E-01 | TAG [48:3]       | -0,111 | 5,45E-01 | -0,127 | 5,40E-01 | 0,301 | 1,70E-01 | -0,167 | 4,24E-01 |
| TAG [48:2]       | 1,73E+00 | 3,96E-01 | 1,67E+00 | 4,97E-01 | 1,74E+00 | 6,05E-01 | 2,13E+00 | 7,65E-01 | 1,97E+00 | 4,54E-01 | TAG [48:2]       | -0,051 | 7,93E-01 | 0,007  | 9,74E-01 | 0,298 | 2,20E-01 | -0,111 | 6,30E-01 |
| TAG [48:1]       | 1,03E+00 | 2,61E-01 | 1,06E+00 | 3,66E-01 | 1,08E+00 | 3,93E-01 | 1,28E+00 | 5,05E-01 | 1,18E+00 | 2,97E-01 | TAG [48:1]       | 0,041  | 8,56E-01 | 0,073  | 7,54E-01 | 0,319 | 2,33E-01 | -0,115 | 6,48E-01 |
| TAG [48:0]       | 1,32E-01 | 4,09E-02 | 1,48E-01 | 5,67E-02 | 1,49E-01 | 5,76E-02 | 1,77E-01 | 7,51E-02 | 1,52E-01 | 4,31E-02 | TAG [48:0]       | 0,158  | 5,46E-01 | 0,172  | 5,13E-01 | 0,419 | 1,69E-01 | -0,224 | 4,26E-01 |
| TAG [49:4]       | 1,61E-02 | 1,33E-02 | 2,56E-02 | 7,69E-03 | 1,82E-02 | 1,11E-02 | 3,39E-02 | 2,25E-02 | 2,81E-02 | 1,47E-02 | TAG [49:4]       | 0,668  | 1,02E-01 | 0,179  | 7,33E-01 | 1,073 | 8,07E-02 | -0,271 | 5,59E-01 |
| TAG [49:3]       | 1,57E-01 | 6,80E-02 | 1,77E-01 | 5,76E-02 | 1,60E-01 | 7,77E-02 | 2,20E-01 | 1,06E-01 | 1,97E-01 | 6,26E-02 | TAG [49:3]       | 0,175  | 5,32E-01 | 0,028  | 9,34E-01 | 0,492 | 1,83E-01 | -0,165 | 5,99E-01 |
| TAG [49:2]       | 3,38E-01 | 1,56E-01 | 3,86E-01 | 1,35E-01 | 3,78E-01 | 1,93E-01 | 4,78E-01 | 2,57E-01 | 4,41E-01 | 1,57E-01 | TAG [49:2]       | 0,193  | 5,17E-01 | 0,164  | 6,50E-01 | 0,502 | 2,16E-01 | -0,117 | 7,37E-01 |
| TAG [49:1]       | 2,20E-01 | 1,09E-01 | 2,63E-01 | 1,04E-01 | 2,61E-01 | 1,44E-01 | 3,22E-01 | 1,87E-01 | 2,91E-01 | 1,11E-01 | TAG [49:1]       | 0,261  | 4,28E-01 | 0,248  | 5,30E-01 | 0,552 | 2,11E-01 | -0,146 | 6,98E-01 |
| TAG [49:0]       | 2,79E-02 | 1,76E-02 | 3,62E-02 | 1,59E-02 | 3,38E-02 | 2,00E-02 | 4,36E-02 | 2,53E-02 | 3,79E-02 | 1,77E-02 | TAG [49:0]       | 0,376  | 3,39E-01 | 0,280  | 5,36E-01 | 0,647 | 1,81E-01 | -0,202 | 6,18E-01 |
| TAG [50:5]       | 1,22E-01 | 2,83E-02 | 1,21E-01 | 3,48E-02 | 1,03E-01 | 3,40E-02 | 1,51E-01 | 5,13E-02 | 1,24E-01 | 2,43E-02 | TAG [50:5]       | -0,011 | 9,56E-01 | -0,245 | 2,43E-01 | 0,309 | 1,89E-01 | -0,282 | 2,09E-01 |
| TAG [50:4]       | 7,33E-01 | 1,48E-01 | 6,56E-01 | 1,83E-01 | 6,10E-01 | 1,99E-01 | 8,69E-01 | 2,73E-01 | 7,02E-01 | 1,45E-01 | TAG [50:4]       | -0,160 | 3,72E-01 | -0,264 | 1,85E-01 | 0,246 | 2,43E-01 | -0,307 | 1,57E-01 |

|            |          |          |          |          |          |          |          |          |          |          |            |        |          |        |          |       |          |        |          |
|------------|----------|----------|----------|----------|----------|----------|----------|----------|----------|----------|------------|--------|----------|--------|----------|-------|----------|--------|----------|
| TAG [50:3] | 2,65E+00 | 5,34E-01 | 2,30E+00 | 6,49E-01 | 2,45E+00 | 8,31E-01 | 3,17E+00 | 1,06E+00 | 2,73E+00 | 5,93E-01 | TAG [50:3] | -0,202 | 2,64E-01 | -0,111 | 5,85E-01 | 0,261 | 2,40E-01 | -0,216 | 3,31E-01 |
| TAG [50:2] | 3,40E+00 | 7,66E-01 | 3,01E+00 | 8,87E-01 | 3,38E+00 | 1,20E+00 | 4,10E+00 | 1,55E+00 | 3,63E+00 | 8,81E-01 | TAG [50:2] | -0,176 | 3,63E-01 | -0,006 | 9,79E-01 | 0,271 | 2,76E-01 | -0,175 | 4,76E-01 |
| TAG [50:1] | 1,06E+00 | 2,99E-01 | 1,01E+00 | 3,43E-01 | 1,12E+00 | 4,31E-01 | 1,36E+00 | 5,77E-01 | 1,15E+00 | 3,35E-01 | TAG [50:1] | -0,074 | 7,47E-01 | 0,075  | 7,63E-01 | 0,351 | 2,30E-01 | -0,240 | 4,00E-01 |
| TAG [51:5] | 2,04E-02 | 1,34E-02 | 2,91E-02 | 1,05E-02 | 1,55E-02 | 8,95E-03 | 3,27E-02 | 1,90E-02 | 2,31E-02 | 1,16E-02 | TAG [51:5] | 0,511  | 1,72E-01 | -0,398 | 4,03E-01 | 0,681 | 1,67E-01 | -0,503 | 2,51E-01 |
| TAG [51:4] | 1,30E-01 | 5,17E-02 | 1,44E-01 | 4,67E-02 | 1,24E-01 | 5,90E-02 | 1,82E-01 | 8,74E-02 | 1,51E-01 | 4,99E-02 | TAG [51:4] | 0,149  | 5,75E-01 | -0,066 | 8,36E-01 | 0,485 | 1,78E-01 | -0,275 | 3,97E-01 |
| TAG [51:3] | 3,55E-01 | 1,40E-01 | 3,65E-01 | 1,17E-01 | 3,65E-01 | 1,77E-01 | 4,96E-01 | 2,51E-01 | 4,26E-01 | 1,44E-01 | TAG [51:3] | 0,043  | 8,72E-01 | 0,040  | 9,03E-01 | 0,483 | 1,94E-01 | -0,219 | 5,14E-01 |
| TAG [51:2] | 4,55E-01 | 2,04E-01 | 4,70E-01 | 1,59E-01 | 5,01E-01 | 2,59E-01 | 6,34E-01 | 3,43E-01 | 5,68E-01 | 2,00E-01 | TAG [51:2] | 0,048  | 8,69E-01 | 0,141  | 6,95E-01 | 0,480 | 2,33E-01 | -0,159 | 6,50E-01 |
| TAG [51:1] | 1,50E-01 | 7,67E-02 | 1,63E-01 | 6,25E-02 | 1,76E-01 | 9,90E-02 | 2,21E-01 | 1,29E-01 | 1,91E-01 | 7,32E-02 | TAG [51:1] | 0,118  | 7,19E-01 | 0,229  | 5,68E-01 | 0,559 | 2,10E-01 | -0,212 | 5,80E-01 |
| TAG [52:7] | 1,94E-02 | 9,34E-03 | 3,58E-02 | 1,63E-02 | 2,28E-02 | 9,10E-03 | 2,94E-02 | 1,73E-02 | 3,14E-02 | 1,10E-02 | TAG [52:7] | 0,882  | 2,73E-02 | 0,231  | 4,75E-01 | 0,596 | 1,81E-01 | 0,095  | 7,91E-01 |
| TAG [52:6] | 8,28E-02 | 2,02E-02 | 9,40E-02 | 3,20E-02 | 8,12E-02 | 2,47E-02 | 1,08E-01 | 4,60E-02 | 9,55E-02 | 2,36E-02 | TAG [52:6] | 0,182  | 4,19E-01 | -0,028 | 8,90E-01 | 0,387 | 1,78E-01 | -0,181 | 5,03E-01 |
| TAG [52:5] | 4,53E-01 | 9,24E-02 | 4,12E-01 | 1,19E-01 | 3,99E-01 | 1,33E-01 | 5,62E-01 | 2,04E-01 | 4,35E-01 | 9,88E-02 | TAG [52:5] | -0,136 | 4,57E-01 | -0,181 | 3,67E-01 | 0,312 | 1,94E-01 | -0,369 | 1,41E-01 |
| TAG [52:4] | 1,75E+00 | 3,19E-01 | 1,46E+00 | 4,11E-01 | 1,53E+00 | 5,09E-01 | 2,13E+00 | 7,14E-01 | 1,66E+00 | 3,80E-01 | TAG [52:4] | -0,264 | 1,34E-01 | -0,191 | 3,25E-01 | 0,285 | 1,94E-01 | -0,362 | 1,26E-01 |
| TAG [52:3] | 3,67E+00 | 7,36E-01 | 2,94E+00 | 8,37E-01 | 3,51E+00 | 1,20E+00 | 4,42E+00 | 1,58E+00 | 3,74E+00 | 8,99E-01 | TAG [52:3] | -0,322 | 8,35E-02 | -0,065 | 7,48E-01 | 0,267 | 2,51E-01 | -0,239 | 3,18E-01 |
| TAG [52:2] | 2,51E+00 | 6,01E-01 | 2,10E+00 | 6,07E-01 | 2,59E+00 | 9,29E-01 | 3,14E+00 | 1,27E+00 | 2,64E+00 | 7,09E-01 | TAG [52:2] | -0,256 | 1,98E-01 | 0,042  | 8,54E-01 | 0,323 | 2,32E-01 | -0,252 | 3,53E-01 |
| TAG [52:1] | 2,48E-01 | 8,66E-02 | 2,20E-01 | 7,05E-02 | 2,70E-01 | 1,14E-01 | 3,43E-01 | 1,58E-01 | 2,79E-01 | 9,19E-02 | TAG [52:1] | -0,174 | 4,87E-01 | 0,119  | 6,78E-01 | 0,464 | 1,69E-01 | -0,297 | 3,50E-01 |
| TAG [53:6] | 7,51E-03 | 5,44E-03 | 1,06E-02 | 5,11E-03 | 5,73E-03 | 5,34E-03 | 1,61E-02 | 1,33E-02 | 7,96E-03 | 5,28E-03 | TAG [53:6] | 0,492  | 3,28E-01 | -0,390 | 6,16E-01 | 1,099 | 2,11E-01 | -1,016 | 1,62E-01 |
| TAG [53:5] | 8,35E-02 | 3,50E-02 | 9,34E-02 | 3,07E-02 | 8,25E-02 | 4,21E-02 | 1,26E-01 | 6,63E-02 | 9,53E-02 | 3,24E-02 | TAG [53:5] | 0,161  | 5,59E-01 | -0,019 | 9,57E-01 | 0,596 | 1,35E-01 | -0,406 | 2,61E-01 |
| TAG [53:4] | 2,04E-01 | 7,13E-02 | 2,05E-01 | 6,28E-02 | 1,97E-01 | 9,44E-02 | 2,86E-01 | 1,41E-01 | 2,29E-01 | 7,23E-02 | TAG [53:4] | 0,003  | 9,92E-01 | -0,054 | 8,60E-01 | 0,484 | 1,72E-01 | -0,320 | 3,32E-01 |
| TAG [53:3] | 3,08E-01 | 1,16E-01 | 2,92E-01 | 9,09E-02 | 3,22E-01 | 1,54E-01 | 4,23E-01 | 2,06E-01 | 3,64E-01 | 1,16E-01 | TAG [53:3] | -0,075 | 7,68E-01 | 0,066  | 8,37E-01 | 0,459 | 1,97E-01 | -0,217 | 4,99E-01 |
| TAG [53:2] | 2,09E-01 | 9,03E-02 | 2,00E-01 | 6,51E-02 | 2,29E-01 | 1,18E-01 | 2,86E-01 | 1,50E-01 | 2,51E-01 | 8,76E-02 | TAG [53:2] | -0,063 | 8,24E-01 | 0,133  | 7,07E-01 | 0,451 | 2,43E-01 | -0,191 | 5,78E-01 |
| TAG [54:8] | 4,14E-02 | 1,52E-02 | 6,61E-02 | 2,65E-02 | 4,27E-02 | 1,47E-02 | 5,70E-02 | 3,12E-02 | 5,95E-02 | 1,79E-02 | TAG [54:8] | 0,675  | 3,82E-02 | 0,046  | 8,62E-01 | 0,462 | 2,30E-01 | 0,061  | 8,52E-01 |
| TAG [53:1] | 2,37E-02 | 1,58E-02 | 2,71E-02 | 1,22E-02 | 2,81E-02 | 1,82E-02 | 3,84E-02 | 2,37E-02 | 3,03E-02 | 1,47E-02 | TAG [53:1] | 0,194  | 6,38E-01 | 0,249  | 6,09E-01 | 0,697 | 1,76E-01 | -0,341 | 4,35E-01 |
| TAG [54:7] | 9,44E-02 | 2,90E-02 | 1,41E-01 | 6,16E-02 | 1,07E-01 | 3,58E-02 | 1,37E-01 | 6,38E-02 | 1,33E-01 | 3,79E-02 | TAG [54:7] | 0,580  | 7,26E-02 | 0,180  | 4,54E-01 | 0,535 | 1,14E-01 | -0,042 | 8,86E-01 |
| TAG [54:6] | 2,30E-01 | 5,07E-02 | 2,37E-01 | 7,34E-02 | 2,37E-01 | 7,96E-02 | 3,15E-01 | 1,39E-01 | 2,50E-01 | 7,14E-02 | TAG [54:6] | 0,042  | 8,32E-01 | 0,039  | 8,51E-01 | 0,454 | 1,29E-01 | -0,333 | 2,66E-01 |
| TAG [54:5] | 7,83E-01 | 1,62E-01 | 6,56E-01 | 1,88E-01 | 7,20E-01 | 2,50E-01 | 1,03E+00 | 4,03E-01 | 7,53E-01 | 2,05E-01 | TAG [54:5] | -0,256 | 1,67E-01 | -0,121 | 5,58E-01 | 0,389 | 1,40E-01 | -0,447 | 1,14E-01 |
| TAG [54:4] | 1,56E+00 | 2,80E-01 | 1,21E+00 | 3,53E-01 | 1,42E+00 | 4,73E-01 | 1,95E+00 | 6,72E-01 | 1,48E+00 | 3,65E-01 | TAG [54:4] | -0,367 | 4,50E-02 | -0,130 | 5,01E-01 | 0,320 | 1,60E-01 | -0,394 | 1,14E-01 |

|            |          |          |          |          |          |          |          |          |          |          |            |        |          |        |          |       |          |        |          |
|------------|----------|----------|----------|----------|----------|----------|----------|----------|----------|----------|------------|--------|----------|--------|----------|-------|----------|--------|----------|
| TAG [54:3] | 1,81E+00 | 3,70E-01 | 1,37E+00 | 4,01E-01 | 1,83E+00 | 6,28E-01 | 2,19E+00 | 8,08E-01 | 1,89E+00 | 4,74E-01 | TAG [54:3] | -0,400 | 3,97E-02 | 0,019  | 9,27E-01 | 0,278 | 2,48E-01 | -0,212 | 3,89E-01 |
| TAG [54:2] | 3,99E-01 | 1,09E-01 | 3,26E-01 | 9,38E-02 | 4,21E-01 | 1,61E-01 | 5,14E-01 | 2,14E-01 | 4,41E-01 | 1,19E-01 | TAG [54:2] | -0,291 | 1,73E-01 | 0,077  | 7,55E-01 | 0,363 | 2,06E-01 | -0,219 | 4,25E-01 |
| TAG [54:1] | 2,69E-02 | 9,79E-03 | 2,93E-02 | 1,04E-02 | 2,80E-02 | 1,22E-02 | 3,90E-02 | 1,87E-02 | 3,16E-02 | 9,96E-03 | TAG [54:1] | 0,121  | 6,49E-01 | 0,055  | 8,53E-01 | 0,535 | 1,32E-01 | -0,306 | 3,43E-01 |
| TAG [55:7] | 2,09E-02 | 7,60E-03 | 2,85E-02 | 1,20E-02 | 1,81E-02 | 9,57E-03 | 2,55E-02 | 1,46E-02 | 2,70E-02 | 1,61E-02 | TAG [55:7] | 0,446  | 1,53E-01 | -0,210 | 5,23E-01 | 0,285 | 4,53E-01 | 0,085  | 8,49E-01 |
| TAG [55:6] | 3,79E-02 | 1,73E-02 | 4,71E-02 | 1,67E-02 | 3,82E-02 | 1,91E-02 | 6,24E-02 | 3,65E-02 | 4,64E-02 | 2,19E-02 | TAG [55:6] | 0,311  | 3,00E-01 | 0,010  | 9,77E-01 | 0,717 | 1,14E-01 | -0,427 | 3,14E-01 |
| TAG [55:5] | 1,03E-01 | 4,04E-02 | 1,03E-01 | 3,17E-02 | 9,68E-02 | 4,71E-02 | 1,43E-01 | 6,89E-02 | 1,10E-01 | 3,88E-02 | TAG [55:5] | -0,005 | 9,84E-01 | -0,088 | 7,85E-01 | 0,474 | 1,87E-01 | -0,374 | 2,71E-01 |
| TAG [55:4] | 1,19E-01 | 4,29E-02 | 1,14E-01 | 3,45E-02 | 1,16E-01 | 5,22E-02 | 1,66E-01 | 7,72E-02 | 1,32E-01 | 4,27E-02 | TAG [55:4] | -0,071 | 7,73E-01 | -0,038 | 8,97E-01 | 0,473 | 1,68E-01 | -0,326 | 3,09E-01 |
| TAG [55:3] | 8,62E-02 | 2,97E-02 | 7,88E-02 | 2,33E-02 | 8,51E-02 | 3,54E-02 | 1,12E-01 | 4,93E-02 | 9,70E-02 | 2,85E-02 | TAG [55:3] | -0,130 | 5,88E-01 | -0,019 | 9,46E-01 | 0,383 | 2,28E-01 | -0,213 | 4,63E-01 |
| TAG [55:2] | 2,29E-02 | 1,19E-02 | 2,72E-02 | 1,04E-02 | 2,67E-02 | 1,36E-02 | 3,41E-02 | 1,82E-02 | 3,05E-02 | 1,26E-02 | TAG [55:2] | 0,244  | 4,62E-01 | 0,217  | 5,68E-01 | 0,572 | 1,78E-01 | -0,160 | 6,61E-01 |
| TAG [56:8] | 1,29E-01 | 3,97E-02 | 1,82E-01 | 7,43E-01 | 1,38E-01 | 4,16E-01 | 1,79E-01 | 9,24E-02 | 1,69E-01 | 4,54E-02 | TAG [56:8] | 0,505  | 9,17E-02 | 0,099  | 6,61E-01 | 0,476 | 1,84E-01 | -0,079 | 7,99E-01 |
| TAG [56:7] | 1,76E-01 | 4,37E-02 | 2,24E-01 | 9,13E-02 | 1,99E-01 | 6,07E-02 | 2,59E-01 | 1,31E-01 | 2,27E-01 | 6,92E-02 | TAG [56:7] | 0,344  | 2,06E-01 | 0,179  | 3,95E-01 | 0,554 | 1,16E-01 | -0,188 | 5,61E-01 |
| TAG [56:6] | 2,57E-01 | 5,52E-02 | 2,29E-01 | 6,66E-02 | 2,63E-01 | 8,98E-02 | 3,59E-01 | 1,53E-01 | 2,73E-01 | 8,21E-02 | TAG [56:6] | -0,164 | 3,83E-01 | 0,031  | 8,82E-01 | 0,481 | 1,02E-01 | -0,395 | 1,90E-01 |
| TAG [56:5] | 4,86E-01 | 1,08E-01 | 3,79E-01 | 1,10E-01 | 4,57E-01 | 1,60E-01 | 6,45E-01 | 2,47E-01 | 4,75E-01 | 1,38E-01 | TAG [56:5] | -0,361 | 6,89E-02 | -0,089 | 6,77E-01 | 0,408 | 1,22E-01 | -0,441 | 1,18E-01 |
| TAG [56:4] | 3,90E-01 | 7,04E-02 | 2,93E-01 | 8,97E-02 | 3,74E-01 | 1,21E-01 | 4,90E-01 | 1,63E-01 | 3,86E-01 | 9,55E-02 | TAG [56:4] | -0,412 | 3,07E-02 | -0,061 | 7,50E-01 | 0,327 | 1,40E-01 | -0,342 | 1,52E-01 |
| TAG [56:3] | 1,85E-01 | 3,47E-02 | 1,57E-01 | 4,57E-01 | 1,87E-01 | 6,33E-01 | 2,20E-01 | 6,84E-02 | 2,03E-01 | 3,72E-02 | TAG [56:3] | -0,237 | 1,88E-01 | 0,010  | 9,62E-01 | 0,246 | 2,30E-01 | -0,113 | 5,64E-01 |
| TAG [56:2] | 4,94E-02 | 1,28E-02 | 4,53E-02 | 1,39E-02 | 5,21E-02 | 1,87E-02 | 5,92E-02 | 2,09E-02 | 5,53E-02 | 1,25E-02 | TAG [56:2] | -0,124 | 5,53E-01 | 0,079  | 7,34E-01 | 0,262 | 2,85E-01 | -0,097 | 6,68E-01 |
| TAG [57:8] | 6,24E-03 | 4,05E-03 | 1,24E-02 | 5,97E-03 | 5,86E-03 | 3,52E-03 | 1,55E-02 | 1,01E-02 | 9,68E-03 | 6,79E-03 | TAG [57:8] | 0,996  | 4,94E-02 | -0,091 | 8,54E-01 | 1,314 | 6,79E-02 | -0,680 | 2,36E-01 |
| TAG [57:7] | 1,81E-02 | 9,45E-03 | 2,73E-02 | 1,27E-02 | 1,67E-02 | 9,69E-03 | 3,00E-02 | 2,26E-02 | 2,33E-02 | 1,29E-02 | TAG [57:7] | 0,592  | 1,23E-01 | -0,114 | 7,79E-01 | 0,729 | 1,96E-01 | -0,363 | 4,87E-01 |
| TAG [57:6] | 3,03E-02 | 1,17E-02 | 3,26E-02 | 1,05E-02 | 2,60E-02 | 1,23E-02 | 4,76E-02 | 2,44E-02 | 3,04E-02 | 1,12E-02 | TAG [57:6] | 0,104  | 6,91E-01 | -0,219 | 4,90E-01 | 0,652 | 9,63E-02 | -0,647 | 9,55E-02 |
| TAG [57:5] | 4,07E-02 | 1,33E-02 | 4,22E-02 | 1,34E-02 | 3,90E-02 | 1,90E-02 | 6,14E-02 | 3,03E-02 | 4,48E-02 | 1,55E-02 | TAG [57:5] | 0,050  | 8,32E-01 | -0,065 | 8,31E-01 | 0,592 | 1,03E-01 | -0,455 | 1,95E-01 |
| TAG [57:4] | 2,01E-02 | 8,73E-03 | 2,17E-02 | 6,70E-03 | 1,92E-02 | 9,14E-03 | 2,78E-02 | 1,43E-02 | 2,39E-02 | 1,06E-02 | TAG [57:4] | 0,110  | 6,87E-01 | -0,068 | 8,39E-01 | 0,465 | 2,26E-01 | -0,219 | 5,54E-01 |
| TAG [57:3] | 6,64E-03 | 3,42E-03 | 8,18E-03 | 2,55E-03 | 7,00E-03 | 3,65E-03 | 8,07E-03 | 4,44E-03 | 8,45E-03 | 3,68E-03 | TAG [57:3] | 0,302  | 3,22E-01 | 0,077  | 8,40E-01 | 0,281 | 4,95E-01 | 0,066  | 8,59E-01 |
| TAG [58:8] | 1,24E-01 | 3,37E-02 | 1,55E-01 | 5,76E-02 | 1,39E-01 | 4,25E-02 | 1,78E-01 | 9,03E-02 | 1,63E-01 | 4,83E-02 | TAG [58:8] | 0,319  | 2,13E-01 | 0,166  | 4,42E-01 | 0,516 | 1,42E-01 | -0,125 | 6,94E-01 |
| TAG [58:7] | 1,13E-01 | 2,62E-02 | 1,17E-01 | 3,79E-02 | 1,21E-01 | 4,02E-02 | 1,63E-01 | 7,41E-02 | 1,33E-01 | 4,04E-02 | TAG [58:7] | 0,047  | 8,23E-01 | 0,099  | 6,44E-01 | 0,521 | 1,01E-01 | -0,292 | 3,43E-01 |
| TAG [58:6] | 1,22E-01 | 2,26E-02 | 9,31E-02 | 2,76E-02 | 1,14E-01 | 4,01E-02 | 1,64E-01 | 5,71E-02 | 1,20E-01 | 3,36E-02 | TAG [58:6] | -0,386 | 4,03E-02 | -0,089 | 6,62E-01 | 0,428 | 7,62E-02 | -0,449 | 8,86E-02 |
| TAG [58:5] | 1,23E-01 | 2,65E-02 | 9,33E-02 | 2,70E-02 | 1,19E-01 | 4,24E-02 | 1,60E-01 | 5,15E-02 | 1,23E-01 | 2,95E-02 | TAG [58:5] | -0,396 | 4,46E-02 | -0,049 | 8,21E-01 | 0,381 | 9,67E-02 | -0,378 | 1,07E-01 |

|            |          |          |          |          |          |          |          |          |          |          |            |        |          |        |          |        |          |        |          |
|------------|----------|----------|----------|----------|----------|----------|----------|----------|----------|----------|------------|--------|----------|--------|----------|--------|----------|--------|----------|
| TAG [58:4] | 5,91E-02 | 1,09E-02 | 4,83E-02 | 1,40E-02 | 5,97E-02 | 1,86E-02 | 7,30E-02 | 2,28E-02 | 6,69E-02 | 1,23E-02 | TAG [58:4] | -0,291 | 1,08E-01 | 0,015  | 9,36E-01 | 0,304  | 1,48E-01 | -0,126 | 5,24E-01 |
| TAG [58:3] | 2,87E-02 | 8,74E-03 | 2,61E-02 | 7,91E-03 | 3,05E-02 | 1,27E-02 | 3,04E-02 | 1,04E-02 | 3,17E-02 | 9,13E-03 | TAG [58:3] | -0,136 | 5,45E-01 | 0,087  | 7,48E-01 | 0,083  | 7,35E-01 | 0,060  | 8,03E-01 |
| TAG [58:2] | 1,58E-02 | 5,40E-03 | 1,95E-02 | 8,03E-03 | 2,15E-02 | 7,94E-03 | 2,06E-02 | 1,03E-02 | 2,13E-02 | 5,27E-03 | TAG [58:2] | 0,303  | 2,98E-01 | 0,439  | 1,20E-01 | 0,377  | 2,76E-01 | 0,053  | 8,55E-01 |
| PC [28:1]  | 1,56E-02 | 2,99E-03 | 1,29E-02 | 4,05E-03 | 3,46E-03 | 1,62E-03 | 1,21E-02 | 6,82E-03 | 5,06E-03 | 2,97E-03 | PC [28:1]  | -0,270 | 1,57E-01 | -2,171 | 3,02E-07 | -0,370 | 2,06E-01 | -1,252 | 2,04E-02 |
| PC [28:0]  | 7,06E-02 | 9,53E-03 | 6,28E-02 | 1,61E-02 | 3,81E-02 | 1,06E-02 | 6,80E-02 | 1,70E-02 | 4,59E-02 | 6,81E-03 | PC [28:0]  | -0,168 | 2,61E-01 | -0,890 | 1,51E-05 | -0,053 | 7,20E-01 | -0,567 | 4,87E-03 |
| PC [30:2]  | 5,93E-02 | 1,14E-02 | 5,32E-02 | 1,48E-02 | 2,64E-02 | 1,18E-02 | 5,24E-02 | 1,49E-02 | 3,53E-02 | 7,84E-03 | PC [30:2]  | -0,157 | 3,72E-01 | -1,168 | 5,94E-05 | -0,179 | 3,28E-01 | -0,568 | 1,43E-02 |
| PC [30:1]  | 7,50E-01 | 1,09E-01 | 6,90E-01 | 1,89E-01 | 4,68E-01 | 1,38E-01 | 7,48E-01 | 1,54E-01 | 5,71E-01 | 7,12E-02 | PC [30:1]  | -0,120 | 4,52E-01 | -0,678 | 4,71E-04 | -0,004 | 9,76E-01 | -0,389 | 1,19E-02 |
| PC [30:0]  | 6,10E-01 | 6,31E-02 | 5,46E-01 | 1,41E-01 | 4,10E-01 | 9,11E-02 | 6,41E-01 | 1,03E-01 | 4,72E-01 | 5,01E-02 | PC [30:0]  | -0,158 | 2,65E-01 | -0,573 | 1,62E-04 | 0,072  | 4,85E-01 | -0,441 | 1,23E-03 |
| PC [32:4]  | 4,32E-02 | 7,45E-03 | 4,32E-02 | 1,30E-02 | 2,42E-02 | 4,61E-03 | 3,87E-02 | 1,19E-02 | 3,63E-02 | 1,69E-02 | PC [32:4]  | 0,002  | 9,93E-01 | -0,835 | 2,65E-05 | -0,158 | 3,91E-01 | -0,090 | 7,65E-01 |
| PC [32:3]  | 2,17E-01 | 3,36E-02 | 1,80E-01 | 5,27E-01 | 1,34E-01 | 3,89E-02 | 2,04E-01 | 3,82E-02 | 1,69E-01 | 1,53E-02 | PC [32:3]  | -0,273 | 1,12E-01 | -0,701 | 4,14E-04 | -0,091 | 4,88E-01 | -0,269 | 3,40E-02 |
| PC [32:2]  | 3,10E+00 | 4,34E-01 | 2,63E+00 | 7,75E-01 | 2,11E+00 | 6,47E-01 | 3,21E+00 | 5,30E-01 | 2,57E+00 | 2,33E-01 | PC [32:2]  | -0,240 | 1,52E-01 | -0,554 | 2,95E-03 | 0,051  | 6,59E-01 | -0,324 | 7,80E-03 |
| PC [32:1]  | 1,14E+01 | 1,86E+00 | 9,43E+00 | 2,76E+00 | 8,21E+00 | 2,45E+00 | 1,20E+01 | 1,66E+00 | 9,87E+00 | 1,14E+00 | PC [32:1]  | -0,280 | 1,08E-01 | -0,479 | 1,00E-02 | 0,071  | 5,41E-01 | -0,285 | 1,10E-02 |
| PC [32:0]  | 8,80E-01 | 1,09E-01 | 9,12E-01 | 2,55E-01 | 7,90E-01 | 1,79E-01 | 1,10E+00 | 1,75E-01 | 9,29E-01 | 1,33E-01 | PC [32:0]  | 0,052  | 7,46E-01 | -0,155 | 2,46E-01 | 0,325  | 1,04E-02 | -0,246 | 4,90E-02 |
| PC [34:4]  | 7,68E-01 | 1,05E-01 | 6,90E-01 | 2,10E-01 | 5,47E-01 | 1,16E-01 | 7,03E-01 | 1,38E-01 | 7,06E-01 | 2,41E-01 | PC [34:4]  | -0,155 | 3,63E-01 | -0,489 | 1,34E-03 | -0,127 | 3,22E-01 | 0,004  | 9,84E-01 |
| PC [34:3]  | 2,66E+00 | 3,92E-01 | 1,97E+00 | 6,38E-01 | 2,01E+00 | 5,70E-01 | 2,66E+00 | 3,82E-01 | 2,32E+00 | 1,60E-01 | PC [34:3]  | -0,438 | 1,96E-02 | -0,405 | 1,84E-02 | 0,000  | 9,98E-01 | -0,200 | 3,57E-02 |
| PC [34:2]  | 8,24E+00 | 9,99E-01 | 6,20E+00 | 1,98E+00 | 7,08E+00 | 1,92E+00 | 9,05E+00 | 1,12E+00 | 8,10E+00 | 5,21E-01 | PC [34:2]  | -0,411 | 2,08E-02 | -0,219 | 1,51E-01 | 0,134  | 1,66E-01 | -0,159 | 5,19E-02 |
| PC [34:1]  | 9,33E+00 | 1,50E+00 | 7,28E+00 | 2,19E+00 | 7,69E+00 | 2,25E+00 | 1,01E+01 | 1,08E+00 | 9,11E+00 | 9,10E-01 | PC [34:1]  | -0,357 | 4,69E-02 | -0,278 | 1,09E-01 | 0,115  | 2,79E-01 | -0,149 | 7,57E-02 |
| PC [34:0]  | 1,14E-01 | 4,46E-02 | 1,53E-01 | 5,15E-02 | 8,12E-02 | 3,84E-02 | 1,92E-01 | 9,57E-02 | 1,27E-01 | 5,68E-02 | PC [34:0]  | 0,428  | 1,25E-01 | -0,489 | 1,38E-01 | 0,750  | 5,97E-02 | -0,594 | 1,30E-01 |
| PC [36:6]  | 1,60E-01 | 2,89E-02 | 1,54E-01 | 4,53E-02 | 1,36E-01 | 3,11E-02 | 1,57E-01 | 2,83E-02 | 1,79E-01 | 5,87E-02 | PC [36:6]  | -0,057 | 7,47E-01 | -0,239 | 1,25E-01 | -0,027 | 8,46E-01 | 0,187  | 3,89E-01 |
| PC [36:5]  | 6,95E-01 | 1,32E-01 | 6,99E-01 | 2,14E-01 | 6,33E-01 | 1,51E-01 | 7,01E-01 | 1,41E-01 | 7,90E-01 | 2,33E-01 | PC [36:5]  | 0,008  | 9,64E-01 | -0,136 | 3,92E-01 | 0,011  | 9,41E-01 | 0,172  | 3,96E-01 |
| PC [36:4]  | 2,46E+00 | 4,18E-01 | 2,13E+00 | 6,20E-01 | 2,10E+00 | 5,34E-01 | 2,55E+00 | 3,93E-01 | 2,42E+00 | 2,80E-01 | PC [36:4]  | -0,206 | 2,35E-01 | -0,228 | 1,55E-01 | 0,049  | 6,92E-01 | -0,072 | 4,91E-01 |
| PC [36:3]  | 4,33E+00 | 6,04E-01 | 2,90E+00 | 1,10E+00 | 3,98E+00 | 1,08E+00 | 4,74E+00 | 7,98E-01 | 4,46E+00 | 3,70E-01 | PC [36:3]  | -0,580 | 6,00E-03 | -0,123 | 4,33E-01 | 0,131  | 2,76E-01 | -0,089 | 3,85E-01 |
| PC [36:2]  | 4,01E+00 | 5,39E-01 | 2,80E+00 | 1,00E+00 | 4,11E+00 | 1,09E+00 | 4,75E+00 | 8,81E-01 | 4,60E+00 | 4,73E-01 | PC [36:2]  | -0,515 | 9,81E-03 | 0,035  | 8,21E-01 | 0,246  | 6,63E-02 | -0,048 | 6,73E-01 |
| PC [36:1]  | 1,24E+00 | 3,21E-01 | 8,34E-01 | 3,49E-01 | 1,04E+00 | 3,79E-01 | 1,48E+00 | 2,31E-01 | 1,30E+00 | 2,27E-01 | PC [36:1]  | -0,569 | 3,04E-02 | -0,256 | 2,71E-01 | 0,257  | 1,24E-01 | -0,189 | 1,50E-01 |
| PC [38:7]  | 1,81E-01 | 3,19E-02 | 1,81E-01 | 5,49E-02 | 2,04E-01 | 5,05E-02 | 2,00E-01 | 6,12E-02 | 2,60E-01 | 6,18E-02 | PC [38:7]  | 0,002  | 9,92E-01 | 0,176  | 2,84E-01 | 0,144  | 4,54E-01 | 0,378  | 8,27E-02 |
| PC [38:6]  | 6,62E-01 | 1,54E-01 | 5,74E-01 | 1,79E-01 | 6,71E-01 | 1,85E-01 | 7,33E-01 | 1,94E-01 | 8,39E-01 | 1,64E-01 | PC [38:6]  | -0,206 | 3,10E-01 | 0,018  | 9,24E-01 | 0,146  | 4,46E-01 | 0,195  | 2,71E-01 |

|             |          |          |          |          |          |          |          |          |          |          |             |        |          |        |          |        |          |        |          |
|-------------|----------|----------|----------|----------|----------|----------|----------|----------|----------|----------|-------------|--------|----------|--------|----------|--------|----------|--------|----------|
| PC [38:5]   | 8,04E-01 | 1,27E-01 | 6,86E-01 | 2,02E-01 | 8,53E-01 | 1,90E-01 | 9,12E-01 | 2,62E-01 | 9,63E-01 | 1,75E-01 | PC [38:5]   | -0,230 | 1,82E-01 | 0,085  | 5,56E-01 | 0,181  | 3,19E-01 | 0,079  | 6,59E-01 |
| PC [38:4]   | 1,37E+00 | 2,04E-01 | 9,06E-01 | 3,29E-01 | 1,34E+00 | 3,61E-01 | 1,61E+00 | 3,44E-01 | 1,49E+00 | 1,88E-01 | PC [38:4]   | -0,600 | 4,16E-03 | -0,033 | 8,33E-01 | 0,232  | 1,18E-01 | -0,112 | 4,07E-01 |
| PC [38:3]   | 8,00E-01 | 1,46E-01 | 4,61E-01 | 2,25E-01 | 7,32E-01 | 2,29E-01 | 9,55E-01 | 1,55E-01 | 8,71E-01 | 1,05E-01 | PC [38:3]   | -0,796 | 3,02E-03 | -0,129 | 4,85E-01 | 0,255  | 6,74E-02 | -0,133 | 2,35E-01 |
| PC [38:2]   | 1,39E-01 | 2,57E-02 | 9,70E-02 | 4,21E-02 | 1,27E-01 | 4,49E-02 | 1,56E-01 | 2,30E-02 | 1,54E-01 | 2,34E-02 | PC [38:2]   | -0,516 | 3,16E-02 | -0,124 | 5,43E-01 | 0,168  | 2,00E-01 | -0,013 | 9,10E-01 |
| PC [38:1]   | 7,06E-03 | 1,72E-03 | 5,33E-03 | 2,82E-03 | 5,61E-03 | 3,04E-03 | 7,67E-03 | 2,43E-03 | 7,28E-03 | 3,17E-03 | PC [38:1]   | -0,406 | 1,60E-01 | -0,332 | 2,59E-01 | 0,119  | 5,83E-01 | -0,075 | 7,96E-01 |
| PC [40:7]   | 2,42E-01 | 4,17E-02 | 1,96E-01 | 6,39E-02 | 3,19E-01 | 7,39E-02 | 3,10E-01 | 1,18E-01 | 3,88E-01 | 7,52E-02 | PC [40:7]   | -0,308 | 1,07E-01 | 0,398  | 2,25E-02 | 0,359  | 1,49E-01 | 0,322  | 1,48E-01 |
| PC [40:6]   | 1,96E-01 | 3,83E-02 | 1,41E-01 | 4,91E-02 | 1,99E-01 | 5,25E-02 | 2,29E-01 | 5,95E-02 | 2,43E-01 | 3,45E-02 | PC [40:6]   | -0,471 | 2,68E-02 | 0,021  | 9,01E-01 | 0,227  | 2,14E-01 | 0,086  | 5,79E-01 |
| PC [40:5]   | 8,65E-02 | 1,16E-02 | 5,77E-02 | 2,02E-02 | 8,34E-02 | 2,26E-02 | 9,70E-02 | 2,14E-02 | 9,44E-02 | 1,27E-02 | PC [40:5]   | -0,584 | 3,56E-03 | -0,053 | 7,34E-01 | 0,166  | 2,48E-01 | -0,039 | 7,74E-01 |
| PC [40:4]   | 5,87E-02 | 1,06E-02 | 3,79E-02 | 1,61E-02 | 5,70E-02 | 1,74E-02 | 7,13E-02 | 1,10E-02 | 6,58E-02 | 7,63E-03 | PC [40:4]   | -0,633 | 8,51E-03 | -0,044 | 8,11E-01 | 0,281  | 4,22E-02 | -0,116 | 2,75E-01 |
| PC [40:3]   | 1,75E-02 | 2,58E-03 | 9,05E-03 | 5,15E-03 | 1,45E-02 | 6,65E-03 | 1,97E-02 | 3,03E-03 | 1,85E-02 | 3,56E-03 | PC [40:3]   | -0,955 | 9,36E-04 | -0,273 | 2,51E-01 | 0,167  | 1,62E-01 | -0,090 | 5,02E-01 |
| PC [40:2]   | 5,31E-03 | 1,44E-03 | 4,14E-03 | 1,37E-03 | 5,29E-03 | 2,37E-03 | 6,08E-03 | 1,17E-03 | 5,36E-03 | 1,18E-03 | PC [40:2]   | -0,359 | 1,33E-01 | -0,004 | 9,90E-01 | 0,197  | 2,78E-01 | -0,182 | 2,57E-01 |
| PC [42:7]   | 2,08E-02 | 3,39E-03 | 1,63E-02 | 5,84E-03 | 2,10E-02 | 6,31E-03 | 2,31E-02 | 5,68E-03 | 2,51E-02 | 2,63E-03 | PC [42:7]   | -0,351 | 8,11E-02 | 0,015  | 9,34E-01 | 0,155  | 3,38E-01 | 0,121  | 3,83E-01 |
| PC [42:6]   | 7,27E-03 | 1,31E-03 | 4,68E-03 | 1,71E-03 | 7,04E-03 | 2,86E-03 | 7,81E-03 | 2,41E-03 | 8,29E-03 | 1,54E-03 | PC [42:6]   | -0,636 | 5,58E-03 | -0,047 | 8,37E-01 | 0,103  | 5,92E-01 | 0,085  | 6,54E-01 |
| PC [42:5]   | 5,14E-03 | 1,36E-03 | 2,95E-03 | 1,26E-03 | 4,39E-03 | 2,10E-03 | 5,01E-03 | 1,54E-03 | 4,95E-03 | 1,35E-03 | PC [42:5]   | -0,802 | 6,58E-03 | -0,227 | 4,12E-01 | -0,037 | 8,64E-01 | -0,017 | 9,40E-01 |
| PC [42:4]   | 4,12E-03 | 9,03E-04 | 4,13E-03 | 4,49E-04 | 4,42E-03 | 1,70E-03 | 4,79E-03 | 2,26E-03 | 4,63E-03 | 1,33E-03 | PC [42:4]   | 0,002  | 9,95E-01 | 0,101  | 6,76E-01 | 0,216  | 4,57E-01 | -0,046 | 8,82E-01 |
| PC-O [28:0] | 2,31E-03 | 1,13E-03 | 3,02E-03 | 1,68E-03 | 5,08E-03 | 2,69E-03 | 2,81E-03 | 1,05E-03 | 3,13E-03 | 3,86E-04 | PC-O [28:0] | 0,389  | 4,82E-01 | 1,140  | 1,06E-01 | 0,284  | 4,92E-01 | 0,155  | 7,02E-01 |
| PC-O [32:2] | 3,80E-03 | 1,83E-03 | 5,41E-03 | 8,09E-04 | 2,21E-03 | 1,78E-03 | 3,37E-03 | 1,81E-03 | 3,70E-03 | 1,83E-03 | PC-O [32:2] | 0,510  | 7,69E-02 | -0,778 | 1,82E-01 | -0,171 | 6,95E-01 | 0,135  | 7,71E-01 |
| PC-O [32:1] | 9,47E-03 | 6,70E-03 | 1,36E-02 | 6,07E-03 | 5,61E-03 | 5,57E-03 | 1,12E-02 | 7,48E-03 | 9,85E-03 | 6,67E-03 | PC-O [32:1] | 0,525  | 2,14E-01 | -0,755 | 2,31E-01 | 0,245  | 6,41E-01 | -0,187 | 7,15E-01 |
| PC-O [32:0] | 5,72E-03 | 4,05E-03 | 8,69E-03 | 3,51E-03 | 3,93E-03 | 3,18E-03 | 9,61E-03 | 5,28E-03 | 5,83E-03 | 2,69E-03 | PC-O [32:0] | 0,605  | 1,67E-01 | -0,540 | 4,45E-01 | 0,750  | 1,98E-01 | -0,723 | 1,57E-01 |
| PC-O [34:3] | 3,40E-03 | 8,50E-04 | 2,30E-03 | 7,92E-04 | 2,74E-03 | 1,51E-03 | 2,12E-03 | 1,00E-03 | 2,41E-03 | 8,37E-04 | PC-O [34:3] | -0,566 | 9,51E-02 | -0,311 | 5,32E-01 | -0,680 | 1,17E-01 | 0,186  | 6,31E-01 |
| PC-O [34:2] | 7,59E-03 | 2,24E-03 | 7,92E-03 | 3,56E-03 | 5,81E-03 | 2,88E-03 | 7,68E-03 | 3,24E-03 | 8,06E-03 | 2,89E-03 | PC-O [34:2] | 0,061  | 8,28E-01 | -0,385 | 1,89E-01 | 0,017  | 9,50E-01 | 0,069  | 8,15E-01 |
| PC-O [34:1] | 2,02E-02 | 4,78E-03 | 1,60E-02 | 4,90E-03 | 1,49E-02 | 3,48E-03 | 2,15E-02 | 7,76E-03 | 1,69E-02 | 5,69E-03 | PC-O [34:1] | -0,335 | 1,05E-01 | -0,443 | 2,29E-02 | 0,091  | 6,93E-01 | -0,354 | 2,02E-01 |
| PC-O [36:5] | 2,24E-03 | 1,11E-03 | 2,56E-03 | 4,39E-04 | 1,72E-03 | 8,95E-04 | 2,15E-03 | 5,89E-04 | 3,74E-03 | 7,42E-04 | PC-O [36:5] | 0,193  | 5,39E-01 | -0,381 | 4,92E-01 | -0,059 | 8,83E-01 | 0,802  | 1,46E-02 |
| PC-O [36:4] | 4,58E-03 | 1,34E-03 | 4,14E-03 | 1,19E-03 | 3,39E-03 | 8,44E-04 | 5,14E-03 | 2,14E-03 | 4,12E-03 | 1,43E-03 | PC-O [36:4] | -0,147 | 5,24E-01 | -0,435 | 5,61E-02 | 0,165  | 5,79E-01 | -0,317 | 3,08E-01 |
| PC-O [36:3] | 4,10E-03 | 1,14E-03 | 2,80E-03 | 7,05E-04 | 3,35E-03 | 1,15E-03 | 3,68E-03 | 1,01E-03 | 3,33E-03 | 8,98E-04 | PC-O [36:3] | -0,551 | 2,44E-02 | -0,289 | 2,46E-01 | -0,157 | 4,75E-01 | -0,140 | 5,17E-01 |
| PC-O [38:5] | 4,21E-03 | 9,59E-04 | 4,04E-03 | 5,19E-04 | 3,13E-03 | 1,38E-03 | 3,05E-03 | 1,81E-03 | 3,14E-03 | 1,31E-03 | PC-O [38:5] | -0,059 | 6,95E-01 | -0,429 | 1,35E-01 | -0,466 | 1,87E-01 | 0,043  | 9,14E-01 |

|             |          |          |          |          |          |          |          |          |          |          |             |        |          |        |          |        |          |        |          |
|-------------|----------|----------|----------|----------|----------|----------|----------|----------|----------|----------|-------------|--------|----------|--------|----------|--------|----------|--------|----------|
| PC-O [38:4] | 4,60E-03 | 8,75E-04 | 3,18E-03 | 1,14E-03 | 3,74E-03 | 1,16E-03 | 4,02E-03 | 7,25E-04 | 3,74E-03 | 1,92E-03 | PC-O [38:4] | -0,532 | 1,76E-02 | -0,298 | 1,27E-01 | -0,193 | 2,16E-01 | -0,105 | 7,39E-01 |
| Chol [14:1] | 4,41E-02 | 6,98E-03 | 3,89E-02 | 9,99E-03 | 2,40E-02 | 5,99E-03 | 4,48E-02 | 1,36E-02 | 2,93E-02 | 5,73E-03 | Chol [14:1] | -0,181 | 2,48E-01 | -0,878 | 2,37E-05 | 0,021  | 9,06E-01 | -0,610 | 1,16E-02 |
| Chol [14:0] | 2,06E-01 | 2,17E-02 | 2,13E-01 | 4,72E-02 | 1,59E-01 | 3,59E-02 | 2,10E-01 | 2,52E-02 | 1,73E-01 | 2,43E-02 | Chol [14:0] | 0,043  | 7,37E-01 | -0,375 | 6,61E-03 | 0,027  | 7,52E-01 | -0,278 | 1,28E-02 |
| Chol [15:0] | 5,94E-02 | 2,13E-02 | 7,43E-02 | 1,84E-02 | 5,45E-02 | 2,39E-02 | 7,54E-02 | 2,26E-02 | 6,85E-02 | 1,74E-02 | Chol [15:0] | 0,323  | 1,57E-01 | -0,125 | 6,69E-01 | 0,344  | 1,82E-01 | -0,138 | 5,16E-01 |
| Chol [16:2] | 7,11E-02 | 6,49E-03 | 6,82E-02 | 1,88E-02 | 4,83E-02 | 1,38E-02 | 7,40E-02 | 1,15E-02 | 5,47E-02 | 9,56E-03 | Chol [16:2] | -0,059 | 6,89E-01 | -0,557 | 8,57E-04 | 0,057  | 5,57E-01 | -0,435 | 3,62E-03 |
| Chol [16:1] | 1,01E+00 | 7,07E-02 | 7,86E-01 | 1,85E-01 | 7,88E-01 | 1,62E-01 | 1,07E+00 | 6,54E-02 | 8,29E-01 | 7,12E-02 | Chol [16:1] | -0,361 | 6,56E-03 | -0,358 | 3,23E-03 | 0,089  | 9,16E-02 | -0,374 | 1,08E-05 |
| Chol [16:0] | 4,75E-01 | 4,22E-02 | 4,40E-01 | 8,54E-02 | 4,00E-01 | 8,70E-02 | 4,99E-01 | 2,72E-02 | 4,22E-01 | 4,29E-02 | Chol [16:0] | -0,111 | 3,16E-01 | -0,246 | 4,67E-02 | 0,072  | 2,15E-01 | -0,242 | 1,31E-03 |
| Chol [17:1] | 9,48E-02 | 1,45E-02 | 9,06E-02 | 1,73E-02 | 8,09E-02 | 2,17E-02 | 1,09E-01 | 1,85E-02 | 9,01E-02 | 1,66E-02 | Chol [17:1] | -0,067 | 5,99E-01 | -0,230 | 1,52E-01 | 0,207  | 1,09E-01 | -0,282 | 5,15E-02 |
| Chol [18:3] | 9,48E-02 | 1,21E-02 | 8,70E-02 | 2,36E-02 | 6,10E-02 | 1,68E-02 | 9,98E-02 | 1,20E-02 | 7,10E-02 | 1,55E-02 | Chol [18:3] | -0,124 | 4,19E-01 | -0,637 | 3,99E-04 | 0,074  | 4,40E-01 | -0,492 | 1,57E-03 |
| Chol [18:2] | 5,67E-01 | 3,62E-02 | 4,17E-01 | 1,25E-01 | 4,49E-01 | 8,40E-02 | 6,03E-01 | 4,00E-02 | 4,55E-01 | 2,58E-02 | Chol [18:2] | -0,443 | 5,66E-03 | -0,337 | 2,61E-03 | 0,089  | 9,08E-02 | -0,407 | 9,51E-07 |
| Chol [18:1] | 1,74E+00 | 1,53E-01 | 1,29E+00 | 3,27E-01 | 1,42E+00 | 2,53E-01 | 1,78E+00 | 1,04E-01 | 1,44E+00 | 1,07E-01 | Chol [18:1] | -0,429 | 3,58E-03 | -0,288 | 9,59E-03 | 0,034  | 5,63E-01 | -0,307 | 3,04E-05 |
| Chol [18:0] | 6,78E-02 | 1,18E-02 | 6,45E-02 | 1,38E-02 | 5,93E-02 | 8,93E-03 | 8,12E-02 | 1,68E-02 | 6,00E-02 | 9,48E-03 | Chol [18:0] | -0,071 | 6,20E-01 | -0,193 | 1,26E-01 | 0,261  | 9,28E-02 | -0,438 | 8,80E-03 |
| Chol [19:1] | 3,70E-02 | 8,49E-03 | 3,12E-02 | 5,69E-03 | 2,50E-02 | 6,19E-03 | 3,34E-02 | 6,84E-03 | 2,91E-02 | 5,03E-03 | Chol [19:1] | -0,246 | 1,30E-01 | -0,569 | 5,83E-03 | -0,148 | 3,86E-01 | -0,200 | 1,83E-01 |
| Chol [20:3] | 2,09E-01 | 1,58E-02 | 1,69E-01 | 4,45E-02 | 1,59E-01 | 2,39E-02 | 2,14E-01 | 1,66E-02 | 1,58E-01 | 1,16E-02 | Chol [20:3] | -0,309 | 3,03E-02 | -0,398 | 2,02E-04 | 0,036  | 5,37E-01 | -0,442 | 3,29E-06 |
| Chol [20:2] | 1,37E-01 | 1,66E-02 | 9,58E-02 | 3,01E-02 | 1,09E-01 | 1,78E-02 | 1,36E-01 | 1,57E-02 | 1,06E-01 | 1,36E-02 | Chol [20:2] | -0,519 | 4,24E-03 | -0,338 | 4,87E-03 | -0,019 | 8,35E-01 | -0,357 | 1,74E-03 |
| Chol [20:1] | 5,68E-02 | 5,62E-03 | 5,69E-02 | 1,06E-02 | 3,97E-02 | 1,16E-02 | 4,91E-02 | 9,92E-03 | 4,55E-02 | 1,18E-02 | Chol [20:1] | 0,002  | 9,86E-01 | -0,517 | 2,15E-03 | -0,211 | 8,08E-02 | -0,111 | 5,35E-01 |
| Chol [22:3] | 3,51E-02 | 6,56E-03 | 2,83E-02 | 8,30E-03 | 2,09E-02 | 6,30E-03 | 3,39E-02 | 9,53E-03 | 2,02E-02 | 3,19E-03 | Chol [22:3] | -0,310 | 9,16E-02 | -0,747 | 5,95E-04 | -0,049 | 7,81E-01 | -0,749 | 2,00E-03 |
| Chol [22:2] | 1,10E-02 | 1,27E-03 | 9,24E-03 | 3,41E-03 | 8,17E-03 | 3,87E-03 | 8,43E-03 | 2,47E-03 | 7,50E-03 | 2,60E-03 | Chol [22:2] | -0,253 | 2,19E-01 | -0,431 | 9,54E-02 | -0,385 | 4,48E-02 | -0,169 | 6,02E-01 |
| Chol [22:1] | 1,41E-02 | 5,67E-03 | 1,60E-02 | 3,08E-03 | 1,17E-02 | 2,80E-03 | 9,36E-03 | 2,68E-03 | 1,12E-02 | 4,70E-03 | Chol [22:1] | 0,182  | 4,20E-01 | -0,265 | 3,70E-01 | -0,589 | 6,58E-02 | 0,263  | 3,77E-01 |
| Chol [24:3] | 1,30E-02 | 2,40E-03 | 7,04E-03 | 1,69E-03 | 6,91E-03 | 2,23E-03 | 9,29E-03 | 2,21E-03 | 8,32E-03 | 3,47E-03 | Chol [24:3] | -0,887 | 8,09E-05 | -0,913 | 3,51E-04 | -0,485 | 1,07E-02 | -0,159 | 5,53E-01 |
| Chol [24:2] | 1,16E-02 | 2,45E-03 | 9,60E-03 | 3,11E-03 | 8,06E-03 | 2,26E-03 | 8,02E-03 | 9,06E-04 | 8,61E-03 | 2,23E-03 | Chol [24:2] | -0,268 | 1,83E-01 | -0,519 | 1,03E-02 | -0,527 | 5,93E-03 | 0,102  | 5,60E-01 |
| Chol [24:1] | 2,62E-02 | 4,19E-03 | 2,76E-02 | 7,21E-03 | 2,03E-02 | 5,71E-03 | 2,03E-02 | 2,21E-03 | 2,07E-02 | 4,97E-03 | Chol [24:1] | 0,071  | 6,61E-01 | -0,368 | 3,34E-02 | -0,370 | 5,22E-03 | 0,029  | 8,45E-01 |
| LPC [14:0]  | 1,39E-02 | 2,94E-03 | 1,83E-02 | 4,40E-03 | 8,02E-03 | 2,27E-03 | 1,78E-02 | 3,56E-03 | 1,05E-02 | 2,95E-03 | LPC [14:0]  | 0,398  | 3,31E-02 | -0,794 | 5,14E-04 | 0,360  | 3,55E-02 | -0,770 | 7,25E-04 |
| LPC [16:2]  | 3,74E-03 | 2,47E-03 | 2,32E-03 | 4,76E-04 | 1,54E-03 |          | 3,81E-03 | 2,23E-03 | 1,79E-03 | 2,22E-04 | LPC [16:2]  | -0,690 | 1,33E-01 | -1,284 |          | 0,027  | 9,57E-01 | -1,093 | 2,60E-01 |
| LPC [16:1]  | 2,28E-01 | 7,64E-02 | 2,12E-01 | 2,34E-02 | 1,55E-01 | 6,28E-02 | 2,75E-01 | 4,87E-02 | 1,78E-01 | 2,78E-02 | LPC [16:1]  | -0,106 | 5,77E-01 | -0,559 | 5,47E-02 | 0,270  | 1,86E-01 | -0,631 | 3,18E-04 |
| LPC [16:0]  | 2,11E-01 | 4,19E-02 | 2,12E-01 | 4,22E-02 | 1,58E-01 | 4,73E-02 | 2,54E-01 | 2,08E-02 | 1,99E-01 | 3,43E-02 | LPC [16:0]  | 0,004  | 9,77E-01 | -0,422 | 3,11E-02 | 0,268  | 2,84E-02 | -0,357 | 2,52E-03 |



|            |          |          |          |          |          |          |          |          |          |          |            |        |          |        |          |        |          |        |          |
|------------|----------|----------|----------|----------|----------|----------|----------|----------|----------|----------|------------|--------|----------|--------|----------|--------|----------|--------|----------|
| LPC [18:2] | 7,23E-02 | 2,73E-02 | 5,52E-02 | 1,15E-02 | 5,68E-02 | 2,27E-02 | 8,33E-02 | 1,43E-02 | 6,13E-02 | 1,40E-02 | LPC [18:2] | -0,389 | 1,26E-01 | -0,348 | 2,38E-01 | 0,205  | 3,57E-01 | -0,442 | 1,02E-02 |
| LPC [18:1] | 2,31E-01 | 6,81E-02 | 1,94E-01 | 2,37E-02 | 1,95E-01 | 7,43E-02 | 2,81E-01 | 2,98E-02 | 2,16E-01 | 3,41E-02 | LPC [18:1] | -0,250 | 1,71E-01 | -0,245 | 3,27E-01 | 0,282  | 9,70E-02 | -0,380 | 1,78E-03 |
| LPC [18:0] | 3,14E-02 | 8,77E-03 | 2,19E-02 | 6,63E-03 | 2,63E-02 | 7,20E-03 | 4,09E-02 | 1,35E-02 | 3,29E-02 | 9,85E-03 | LPC [18:0] | -0,523 | 2,75E-02 | -0,257 | 2,22E-01 | 0,380  | 1,25E-01 | -0,314 | 2,07E-01 |
| LPC [20:4] | 2,50E-02 | 7,91E-03 | 3,02E-02 | 6,53E-03 | 2,20E-02 | 7,44E-03 | 2,91E-02 | 3,95E-03 | 2,69E-02 | 7,87E-03 | LPC [20:4] | 0,271  | 1,76E-01 | -0,188 | 4,39E-01 | 0,218  | 2,39E-01 | -0,117 | 5,04E-01 |
| LPC [20:3] | 5,54E-02 | 1,68E-02 | 3,92E-02 | 7,75E-03 | 4,43E-02 | 1,70E-02 | 6,53E-02 | 9,48E-03 | 4,71E-02 | 8,46E-03 | LPC [20:3] | -0,500 | 2,67E-02 | -0,322 | 2,11E-01 | 0,237  | 1,93E-01 | -0,472 | 1,70E-03 |
| LPC [20:2] | 5,37E-03 | 2,97E-03 | 2,73E-03 | 1,54E-03 | 3,70E-03 | 2,14E-03 | 6,33E-03 | 2,39E-03 | 3,89E-03 | 1,04E-03 | LPC [20:2] | -0,973 | 5,51E-02 | -0,538 | 2,18E-01 | 0,237  | 5,07E-01 | -0,704 | 2,08E-02 |
| LPC [22:6] | 1,36E-02 | 3,78E-03 | 1,18E-02 | 2,01E-03 | 1,27E-02 | 2,74E-03 | 1,72E-02 | 3,26E-03 | 1,49E-02 | 3,80E-03 | LPC [22:6] | -0,206 | 2,52E-01 | -0,094 | 6,12E-01 | 0,343  | 6,88E-02 | -0,208 | 2,31E-01 |
| LPE [16:1] | 8,14E-02 | 2,97E-02 | 8,50E-02 | 2,38E-02 | 3,65E-02 | 1,44E-02 | 1,04E-01 | 2,57E-02 | 5,67E-02 | 2,35E-02 | LPE [16:1] | 0,062  | 7,95E-01 | -1,157 | 1,77E-03 | 0,349  | 1,47E-01 | -0,872 | 2,65E-03 |
| LPE [16:0] | 9,13E-02 | 3,52E-02 | 1,04E-01 | 3,26E-02 | 5,28E-02 | 1,99E-02 | 1,21E-01 | 3,06E-02 | 8,35E-02 | 3,20E-02 | LPE [16:0] | 0,184  | 4,77E-01 | -0,790 | 1,75E-02 | 0,410  | 1,04E-01 | -0,538 | 3,66E-02 |
| LPE [18:3] | 3,03E-02 | 1,49E-02 | 2,43E-02 | 1,08E-02 | 1,68E-02 | 8,10E-03 | 3,97E-02 | 8,03E-03 | 2,42E-02 | 1,15E-02 | LPE [18:3] | -0,318 | 3,74E-01 | -0,849 | 4,16E-02 | 0,392  | 1,60E-01 | -0,714 | 1,05E-02 |
| LPE [18:2] | 5,71E-02 | 2,03E-02 | 4,98E-02 | 1,44E-02 | 2,78E-02 | 1,21E-02 | 6,96E-02 | 1,29E-02 | 3,91E-02 | 1,31E-02 | LPE [18:2] | -0,199 | 4,16E-01 | -1,041 | 3,39E-03 | 0,285  | 1,85E-01 | -0,831 | 5,56E-04 |
| LPE [18:1] | 2,31E-01 | 6,76E-02 | 2,22E-01 | 5,76E-02 | 1,30E-01 | 4,84E-02 | 2,99E-01 | 4,38E-02 | 1,73E-01 | 4,47E-02 | LPE [18:1] | -0,057 | 7,79E-01 | -0,834 | 3,86E-03 | 0,369  | 4,20E-02 | -0,790 | 1,02E-04 |
| LPE [18:0] | 1,34E-01 | 3,60E-02 | 1,20E-01 | 3,61E-02 | 9,28E-02 | 2,92E-02 | 1,86E-01 | 3,91E-02 | 1,30E-01 | 3,21E-02 | LPE [18:0] | -0,166 | 4,32E-01 | -0,534 | 2,38E-02 | 0,468  | 1,98E-02 | -0,514 | 9,61E-03 |
| LPE [20:3] | 1,40E-01 | 4,81E-02 | 9,93E-02 | 3,98E-02 | 9,49E-02 | 3,50E-02 | 1,86E-01 | 1,72E-02 | 1,20E-01 | 2,83E-02 | LPE [20:3] | -0,492 | 8,88E-02 | -0,558 | 5,14E-02 | 0,411  | 3,27E-02 | -0,625 | 1,44E-04 |
| LPE [20:2] | 1,87E-02 | 8,22E-03 | 1,48E-02 | 4,61E-03 | 1,24E-02 | 6,52E-03 | 2,70E-02 | 3,50E-03 | 1,48E-02 | 3,87E-03 | LPE [20:2] | -0,341 | 2,57E-01 | -0,595 | 1,10E-01 | 0,529  | 2,79E-02 | -0,865 | 2,52E-05 |
| LPE [20:1] | 4,34E-02 | 1,56E-02 | 3,84E-02 | 7,52E-03 | 3,60E-02 | 1,45E-02 | 6,27E-02 | 7,42E-03 | 4,42E-02 | 6,99E-03 | LPE [20:1] | -0,177 | 4,26E-01 | -0,269 | 3,43E-01 | 0,531  | 1,06E-02 | -0,504 | 2,55E-04 |
| LPI [16:1] | 2,37E-03 | 7,26E-04 | 1,89E-03 | 7,54E-04 | 6,49E-04 | 2,64E-03 | 2,86E-03 | 8,93E-04 | 1,08E-03 | 1,18E-03 | LPI [16:1] | -0,329 | 2,12E-01 | -1,867 | 5,11E-05 | 0,274  | 2,57E-01 | -1,405 | 7,71E-03 |
| LPI [16:0] | 4,86E-03 | 2,05E-03 | 5,65E-03 | 1,56E-03 | 3,37E-03 | 8,70E-04 | 6,54E-03 | 1,61E-03 | 4,42E-03 | 1,96E-03 | LPI [16:0] | 0,218  | 3,98E-01 | -0,528 | 7,91E-02 | 0,429  | 1,04E-01 | -0,564 | 4,16E-02 |
| LPI [18:3] | 1,76E-03 | 9,97E-04 | 2,13E-03 | 1,04E-03 | 1,11E-03 | 3,91E-04 | 3,35E-03 | 8,95E-04 | 2,02E-03 | 1,17E-03 | LPI [18:3] | 0,272  | 4,85E-01 | -0,673 | 1,05E-01 | 0,926  | 6,68E-03 | -0,730 | 3,42E-02 |
| LPI [18:2] | 1,63E-03 | 4,00E-04 | 1,68E-03 | 6,10E-04 | 7,32E-04 | 1,56E-04 | 2,63E-03 | 6,42E-04 | 1,20E-03 | 7,16E-04 | LPI [18:2] | 0,040  | 8,63E-01 | -1,157 | 3,68E-05 | 0,686  | 2,92E-03 | -1,132 | 1,40E-03 |
| LPI [18:1] | 1,27E-02 | 1,84E-03 | 1,19E-02 | 3,58E-03 | 8,32E-03 | 1,71E-03 | 1,73E-02 | 1,85E-03 | 9,59E-03 | 2,63E-03 | LPI [18:1] | -0,088 | 6,08E-01 | -0,607 | 2,35E-04 | 0,450  | 3,12E-04 | -0,853 | 2,06E-05 |
| LPI [18:0] | 2,69E-02 | 6,77E-03 | 2,86E-02 | 6,92E-03 | 2,20E-02 | 5,26E-03 | 4,17E-02 | 9,74E-03 | 2,83E-02 | 5,79E-03 | LPI [18:0] | 0,091  | 6,17E-01 | -0,291 | 1,27E-01 | 0,634  | 4,19E-03 | -0,558 | 5,87E-03 |
| LPI [20:4] | 1,30E-02 | 3,65E-03 | 1,95E-02 | 6,24E-03 | 1,06E-02 | 2,20E-03 | 2,06E-02 | 6,06E-03 | 1,36E-02 | 3,40E-03 | LPI [20:4] | 0,580  | 2,44E-02 | -0,295 | 1,33E-01 | 0,659  | 1,09E-02 | -0,601 | 1,47E-02 |
| LPI [20:3] | 3,95E-02 | 7,87E-03 | 3,94E-02 | 1,04E-02 | 3,10E-02 | 7,77E-03 | 6,39E-02 | 1,29E-02 | 3,76E-02 | 7,13E-03 | LPI [20:3] | -0,003 | 9,85E-01 | -0,349 | 4,80E-02 | 0,695  | 5,92E-04 | -0,764 | 2,50E-04 |
| PA [30:1]  | 8,24E-03 | 2,89E-03 | 5,82E-03 | 4,23E-03 | 9,06E-04 | 3,68E-04 | 2,06E-03 | 1,34E-03 | 1,24E-03 | 7,31E-04 | PA [30:1]  | -0,501 | 2,03E-01 | -3,186 | 5,96E-04 | -1,999 | 1,01E-03 | -0,732 | 2,64E-01 |
| PA [30:0]  | 3,35E-03 | 1,49E-03 | 2,10E-03 | 1,49E-03 |          |          | 1,19E-03 | 3,63E-04 | 6,71E-04 | 4,12E-04 | PA [30:0]  | -0,675 | 1,14E-01 |        |          | -1,499 | 3,88E-02 | -0,822 | 2,34E-01 |

|           |          |          |          |          |          |          |          |          |          |          |           |  |        |          |        |          |        |          |  |        |          |
|-----------|----------|----------|----------|----------|----------|----------|----------|----------|----------|----------|-----------|--|--------|----------|--------|----------|--------|----------|--|--------|----------|
| PA [32:3] | 2,88E-03 | 1,08E-03 | 2,25E-03 | 1,89E-03 | 2,94E-04 |          | 7,56E-04 | 2,69E-04 | 7,14E-04 |          | PA [32:3] |  | -0,354 | 4,61E-01 | -3,294 |          | -1,930 | 3,38E-02 |  | -0,081 |          |
| PA [32:2] | 2,32E-02 | 4,58E-03 | 1,69E-02 | 9,77E-03 | 3,88E-03 | 1,72E-03 | 9,76E-03 | 3,88E-03 | 4,81E-03 | 2,23E-03 | PA [32:2] |  | -0,452 | 1,24E-01 | -2,577 | 2,40E-08 | -1,247 | 8,90E-05 |  | -1,022 | 1,05E-02 |
| PA [32:1] | 4,37E-02 | 9,11E-03 | 3,66E-02 | 1,46E-02 | 1,25E-02 | 2,83E-02 | 2,30E-02 | 1,09E-02 | 1,52E-02 | 5,00E-03 | PA [32:1] |  | -0,256 | 2,60E-01 | -1,804 | 2,44E-07 | -0,926 | 1,51E-03 |  | -0,603 | 8,98E-02 |
| PA [32:0] | 5,90E-03 | 2,13E-03 | 3,94E-03 | 2,16E-03 | 6,86E-04 | 1,86E-04 | 3,09E-03 | 9,97E-04 | 9,33E-04 | 7,53E-04 | PA [32:0] |  | -0,582 | 8,98E-02 | -3,104 | 7,70E-04 | -0,933 | 1,96E-02 |  | -1,727 | 2,71E-03 |
| PA [34:3] | 1,59E-02 | 4,40E-03 | 1,10E-02 | 7,08E-03 | 2,01E-03 | 8,90E-04 | 7,67E-03 | 3,23E-03 | 2,75E-03 | 1,73E-03 | PA [34:3] |  | -0,528 | 1,20E-01 | -2,989 | 4,62E-07 | -1,054 | 2,25E-03 |  | -1,479 | 3,11E-03 |
| PA [34:2] | 4,77E-02 | 1,04E-02 | 3,45E-02 | 1,70E-02 | 1,43E-02 | 4,08E-03 | 2,37E-02 | 1,08E-02 | 1,74E-02 | 4,28E-03 | PA [34:2] |  | -0,467 | 8,30E-02 | -1,734 | 7,62E-07 | -1,008 | 7,60E-04 |  | -0,449 | 1,48E-01 |
| PA [34:1] | 4,33E-02 | 6,32E-03 | 3,67E-02 | 1,22E-02 | 1,47E-02 | 3,46E-03 | 2,67E-02 | 1,14E-02 | 1,82E-02 | 6,28E-03 | PA [34:1] |  | -0,240 | 1,93E-01 | -1,559 | 2,19E-08 | -0,698 | 3,52E-03 |  | -0,549 | 9,33E-02 |
| PA [36:4] | 6,86E-03 | 2,24E-03 | 6,15E-03 | 2,64E-03 | 1,42E-03 | 5,16E-04 | 4,42E-03 | 1,65E-03 | 1,68E-03 | 7,99E-04 | PA [36:4] |  | -0,157 | 5,73E-01 | -2,269 | 1,03E-05 | -0,633 | 4,48E-02 |  | -1,396 | 1,37E-03 |
| PA [36:3] | 1,78E-02 | 3,99E-03 | 1,25E-02 | 6,18E-03 | 6,29E-03 | 1,62E-03 | 1,20E-02 | 2,01E-03 | 6,83E-03 | 1,80E-03 | PA [36:3] |  | -0,514 | 5,95E-02 | -1,500 | 2,60E-06 | -0,567 | 7,11E-03 |  | -0,815 | 2,69E-04 |
| PA [36:2] | 2,26E-02 | 4,00E-03 | 1,75E-02 | 7,41E-03 | 1,02E-02 | 2,78E-03 | 1,43E-02 | 6,00E-03 | 1,17E-02 | 1,81E-03 | PA [36:2] |  | -0,371 | 1,07E-01 | -1,147 | 4,62E-06 | -0,662 | 6,99E-03 |  | -0,286 | 2,68E-01 |
| PA [36:1] | 5,34E-03 | 3,64E-04 | 5,16E-03 | 1,90E-03 | 1,89E-03 | 8,20E-04 | 3,26E-03 | 1,37E-03 | 2,54E-03 | 1,71E-03 | PA [36:1] |  | -0,050 | 7,94E-01 | -1,501 | 3,19E-08 | -0,713 | 1,10E-03 |  | -0,363 | 3,86E-01 |
| PA [38:7] | 1,18E-03 | 3,80E-04 | 1,42E-03 | 1,08E-03 | 6,23E-04 | 1,80E-04 | 8,13E-04 | 1,10E-04 | 7,21E-04 | 1,93E-04 | PA [38:7] |  | 0,271  | 5,85E-01 | -0,922 | 2,37E-02 | -0,539 | 1,49E-01 |  | -0,174 | 5,11E-01 |
| PA [38:6] | 1,33E-03 | 5,25E-04 | 9,54E-04 | 7,16E-04 | 4,01E-04 | 3,32E-04 | 6,78E-04 | 4,77E-04 | 7,55E-04 | 1,73E-04 | PA [38:6] |  | -0,479 | 2,63E-01 | -1,730 | 9,63E-03 | -0,971 | 6,40E-02 |  | 0,154  | 8,44E-01 |
| PA [38:4] | 5,47E-03 | 1,42E-03 | 4,94E-03 | 1,57E-03 | 3,20E-03 | 8,33E-04 | 3,44E-03 | 7,60E-04 | 3,68E-03 | 5,40E-04 | PA [38:4] |  | -0,148 | 4,86E-01 | -0,776 | 1,57E-03 | -0,668 | 8,33E-03 |  | 0,096  | 5,09E-01 |
| PA [38:3] | 1,03E-02 | 1,45E-03 | 7,35E-03 | 3,64E-03 | 5,50E-03 | 1,26E-03 | 7,27E-03 | 9,68E-04 | 5,44E-03 | 1,07E-03 | PA [38:3] |  | -0,494 | 4,80E-02 | -0,911 | 5,04E-06 | -0,510 | 7,36E-04 |  | -0,417 | 6,47E-03 |
| PG [30:1] | 1,55E-03 | 7,63E-04 | 2,60E-03 | 1,19E-03 | 2,81E-04 |          | 4,92E-03 | 4,48E-03 | 1,40E-03 | 1,77E-03 | PG [30:1] |  | 0,746  | 5,41E-02 | -2,464 |          | 1,665  | 5,62E-02 |  | -1,812 | 1,04E-01 |
| PG [32:2] | 5,27E-03 | 1,00E-03 | 5,74E-03 | 1,49E-03 | 2,36E-03 | 8,51E-04 | 7,93E-03 | 2,46E-03 | 4,44E-03 | 1,48E-03 | PG [32:2] |  | 0,122  | 4,77E-01 | -1,161 | 2,09E-05 | 0,589  | 1,47E-02 |  | -0,837 | 4,89E-03 |
| PG [32:1] | 1,18E-02 | 4,75E-03 | 1,82E-02 | 4,95E-03 | 5,11E-03 | 1,62E-03 | 2,38E-02 | 1,67E-02 | 9,64E-03 | 6,10E-03 | PG [32:1] |  | 0,626  | 1,94E-02 | -1,206 | 2,10E-03 | 1,016  | 7,22E-02 |  | -1,305 | 4,30E-02 |
| PG [32:0] | 1,63E-03 | 1,00E-03 | 2,99E-03 | 8,38E-04 | 8,55E-04 | 3,83E-04 | 4,90E-03 | 4,13E-03 | 2,48E-03 | 1,86E-03 | PG [32:0] |  | 0,873  | 1,43E-02 | -0,935 | 9,74E-02 | 1,584  | 4,88E-02 |  | -0,983 | 1,83E-01 |
| PG [34:3] | 6,08E-03 | 1,49E-03 | 4,24E-03 | 2,14E-03 | 4,22E-03 | 2,10E-03 | 7,90E-03 | 1,96E-03 | 4,27E-03 | 1,24E-03 | PG [34:3] |  | -0,519 | 6,63E-02 | -0,526 | 6,05E-02 | 0,378  | 6,19E-02 |  | -0,890 | 7,70E-04 |
| PG [34:2] | 2,41E-02 | 3,86E-03 | 2,76E-02 | 3,88E-03 | 2,05E-02 | 4,53E-03 | 3,67E-02 | 8,76E-03 | 2,53E-02 | 4,23E-03 | PG [34:2] |  | 0,194  | 9,44E-02 | -0,237 | 1,04E-01 | 0,605  | 2,78E-03 |  | -0,538 | 5,93E-03 |
| PG [34:1] | 8,21E-02 | 3,66E-02 | 1,15E-01 | 2,75E-02 | 5,70E-02 | 1,36E-01 | 1,71E-01 | 1,16E-01 | 8,63E-02 | 3,13E-02 | PG [34:1] |  | 0,489  | 6,01E-02 | -0,526 | 9,06E-02 | 1,062  | 5,84E-02 |  | -0,991 | 6,60E-02 |
| PG [36:4] | 5,36E-03 | 1,78E-03 | 3,06E-03 | 1,74E-03 | 4,22E-03 | 1,73E-03 | 6,99E-03 | 1,32E-03 | 4,20E-03 | 1,67E-03 | PG [36:4] |  | -0,810 | 2,03E-02 | -0,346 | 2,14E-01 | 0,382  | 6,88E-02 |  | -0,737 | 3,50E-03 |
| PG [36:3] | 1,64E-02 | 3,94E-03 | 1,16E-02 | 3,98E-03 | 1,47E-02 | 4,64E-03 | 2,12E-02 | 2,54E-03 | 1,43E-02 | 4,00E-03 | PG [36:3] |  | -0,491 | 3,18E-02 | -0,159 | 4,41E-01 | 0,371  | 1,62E-02 |  | -0,569 | 1,78E-03 |
| PG [36:2] | 3,06E-02 | 9,57E-03 | 4,40E-02 | 1,10E-02 | 2,84E-02 | 7,57E-03 | 5,50E-02 | 2,64E-02 | 3,31E-02 | 5,39E-03 | PG [36:2] |  | 0,524  | 2,09E-02 | -0,107 | 6,20E-01 | 0,847  | 2,92E-02 |  | -0,735 | 3,81E-02 |
| PG [36:1] | 1,93E-02 | 6,12E-03 | 2,02E-02 | 3,38E-03 | 1,91E-02 | 4,73E-03 | 3,30E-02 | 1,22E-02 | 2,36E-02 | 4,44E-03 | PG [36:1] |  | 0,069  | 7,08E-01 | -0,016 | 9,39E-01 | 0,778  | 1,42E-02 |  | -0,485 | 6,11E-02 |

|             |          |          |          |          |          |          |          |          |          |          |             |        |          |        |          |        |          |        |          |
|-------------|----------|----------|----------|----------|----------|----------|----------|----------|----------|----------|-------------|--------|----------|--------|----------|--------|----------|--------|----------|
| PG [38:6]   | 4,43E-03 | 7,23E-04 | 4,54E-03 | 1,46E-03 | 3,57E-03 | 7,44E-04 | 6,12E-03 | 1,21E-03 | 4,06E-03 | 7,93E-04 | PG [38:6]   | 0,034  | 8,56E-01 | -0,314 | 3,33E-02 | 0,466  | 5,30E-03 | -0,591 | 1,65E-03 |
| PG [38:5]   | 5,04E-03 | 1,98E-03 | 3,67E-03 | 1,54E-03 | 4,21E-03 | 2,30E-03 | 7,63E-03 | 1,74E-03 | 4,39E-03 | 1,58E-03 | PG [38:5]   | -0,459 | 1,43E-01 | -0,262 | 4,48E-01 | 0,597  | 1,94E-02 | -0,797 | 2,28E-03 |
| PG [38:4]   | 7,26E-03 | 2,82E-03 | 4,84E-03 | 1,93E-03 | 8,33E-03 | 3,51E-03 | 1,10E-02 | 2,27E-03 | 8,04E-03 | 2,70E-03 | PG [38:4]   | -0,585 | 6,50E-02 | 0,199  | 5,12E-01 | 0,596  | 1,57E-02 | -0,449 | 4,17E-02 |
| PG [38:3]   | 4,02E-03 | 1,68E-03 | 2,27E-03 | 1,28E-03 | 4,76E-03 | 2,21E-03 | 5,58E-03 | 1,36E-03 | 5,03E-03 | 1,88E-03 | PG [38:3]   | -0,829 | 3,37E-02 | 0,242  | 4,67E-01 | 0,472  | 7,22E-02 | -0,150 | 5,32E-01 |
| PG [40:6]   | 3,02E-03 | 1,13E-03 | 2,59E-03 | 6,13E-04 | 4,02E-03 | 1,39E-03 | 4,68E-03 | 1,56E-03 | 3,48E-03 | 9,89E-04 | PG [40:6]   | -0,219 | 3,65E-01 | 0,415  | 1,34E-01 | 0,632  | 3,29E-02 | -0,425 | 9,60E-02 |
| PG [40:5]   | 1,07E-03 | 5,10E-04 | 5,65E-04 | 1,05E-04 | 1,29E-03 | 5,35E-04 | 1,26E-03 | 4,15E-04 | 1,04E-03 | 4,76E-04 | PG [40:5]   | -0,923 | 2,32E-01 | 0,269  | 5,04E-01 | 0,230  | 4,84E-01 | -0,275 | 4,46E-01 |
| PI [32:2]   | 1,64E-02 | 1,68E-03 | 1,14E-02 | 5,73E-03 | 3,50E-03 | 1,64E-03 | 1,40E-02 | 6,31E-03 | 5,44E-03 | 4,99E-03 | PI [32:2]   | -0,520 | 3,42E-02 | -2,228 | 3,30E-10 | -0,224 | 3,27E-01 | -1,367 | 1,14E-02 |
| PI [32:1]   | 1,66E-02 | 4,12E-03 | 1,16E-02 | 5,74E-03 | 5,22E-03 | 2,09E-03 | 1,87E-02 | 9,49E-03 | 8,04E-03 | 7,16E-03 | PI [32:1]   | -0,515 | 6,55E-02 | -1,670 | 6,49E-06 | 0,173  | 5,76E-01 | -1,221 | 2,73E-02 |
| PI [34:3]   | 4,48E-02 | 4,90E-03 | 3,83E-02 | 1,28E-02 | 2,43E-02 | 4,93E-03 | 4,91E-02 | 1,07E-02 | 3,08E-02 | 1,03E-02 | PI [34:3]   | -0,226 | 2,03E-01 | -0,882 | 8,48E-07 | 0,133  | 3,24E-01 | -0,672 | 5,05E-03 |
| PI [34:2]   | 1,32E-01 | 1,70E-02 | 9,98E-02 | 3,84E-02 | 5,12E-02 | 1,26E-02 | 1,37E-01 | 3,91E-02 | 6,52E-02 | 3,65E-02 | PI [34:2]   | -0,407 | 4,59E-02 | -1,370 | 3,39E-08 | 0,045  | 7,85E-01 | -1,067 | 2,90E-03 |
| PI [36:4]   | 1,29E-01 | 1,48E-02 | 1,43E-01 | 3,72E-02 | 1,04E-01 | 1,49E-02 | 1,46E-01 | 2,10E-02 | 1,19E-01 | 1,82E-02 | PI [36:4]   | 0,149  | 3,39E-01 | -0,298 | 6,03E-03 | 0,179  | 8,96E-02 | -0,288 | 2,17E-02 |
| PI [36:3]   | 4,28E-01 | 6,13E-02 | 3,94E-01 | 1,11E-01 | 3,51E-01 | 6,13E-02 | 5,23E-01 | 7,19E-02 | 4,18E-01 | 6,17E-02 | PI [36:3]   | -0,121 | 4,53E-01 | -0,287 | 2,45E-02 | 0,290  | 1,57E-02 | -0,326 | 8,95E-03 |
| PI [36:2]   | 1,69E-01 | 2,81E-02 | 1,31E-01 | 4,49E-02 | 1,10E-01 | 2,18E-02 | 1,87E-01 | 2,36E-02 | 1,29E-01 | 2,83E-02 | PI [36:2]   | -0,362 | 6,53E-02 | -0,618 | 3,65E-04 | 0,153  | 1,87E-01 | -0,534 | 9,20E-04 |
| PI [36:1]   | 3,48E-02 | 8,30E-03 | 2,70E-02 | 8,11E-03 | 2,71E-02 | 4,70E-03 | 4,42E-02 | 2,88E-03 | 3,27E-02 | 5,50E-03 | PI [36:1]   | -0,371 | 7,49E-02 | -0,362 | 3,80E-02 | 0,343  | 1,43E-02 | -0,436 | 2,57E-04 |
| PI [38:6]   | 2,80E-02 | 4,56E-03 | 2,83E-02 | 7,82E-03 | 2,40E-03 | 3,65E-03 | 3,14E-02 | 7,06E-03 | 2,88E-02 | 5,78E-03 | PI [38:6]   | 0,015  | 9,29E-01 | -0,226 | 6,90E-02 | 0,164  | 2,84E-01 | -0,122 | 4,54E-01 |
| PI [38:5]   | 1,47E-01 | 2,81E-02 | 1,58E-01 | 4,81E-02 | 1,34E-01 | 2,10E-02 | 1,68E-01 | 2,21E-02 | 1,34E-01 | 2,46E-02 | PI [38:5]   | 0,103  | 5,89E-01 | -0,131 | 3,20E-01 | 0,191  | 1,39E-01 | -0,327 | 1,52E-02 |
| PI [38:4]   | 8,50E-01 | 1,37E-01 | 8,93E-01 | 2,38E-01 | 7,55E-01 | 9,12E-02 | 1,05E+00 | 1,29E-01 | 8,36E-01 | 1,22E-01 | PI [38:4]   | 0,071  | 6,67E-01 | -0,172 | 1,23E-01 | 0,303  | 1,29E-02 | -0,327 | 5,94E-03 |
| PI [38:3]   | 1,49E+00 | 2,65E-01 | 1,28E+00 | 3,76E-01 | 1,32E+00 | 2,19E-01 | 1,97E+00 | 2,07E-01 | 1,52E+00 | 1,83E-01 | PI [38:3]   | -0,227 | 2,03E-01 | -0,174 | 1,85E-01 | 0,400  | 2,04E-03 | -0,373 | 6,40E-04 |
| PI [38:2]   | 1,74E-02 | 5,01E-03 | 9,84E-03 | 9,26E-03 | 1,55E-02 | 6,19E-03 | 2,00E-02 | 9,36E-03 | 2,12E-02 | 5,53E-03 | PI [38:2]   | -0,819 | 6,27E-02 | -0,160 | 5,27E-01 | 0,207  | 4,93E-01 | 0,078  | 7,80E-01 |
| PI [40:7]   | 1,34E-02 | 1,49E-03 | 1,19E-02 | 4,03E-03 | 9,86E-03 | 1,88E-03 | 1,48E-02 | 2,04E-03 | 1,12E-02 | 2,23E-03 | PI [40:7]   | -0,166 | 3,53E-01 | -0,441 | 9,55E-04 | 0,141  | 1,55E-01 | -0,397 | 7,01E-03 |
| PI [40:6]   | 5,99E-02 | 9,28E-03 | 5,46E-02 | 1,70E-02 | 5,17E-02 | 8,38E-03 | 7,07E-02 | 1,45E-02 | 6,53E-02 | 1,19E-02 | PI [40:6]   | -0,132 | 4,58E-01 | -0,210 | 8,79E-02 | 0,241  | 1,02E-01 | -0,114 | 4,42E-01 |
| PI [40:5]   | 2,59E-02 | 3,54E-03 | 2,33E-02 | 7,59E-03 | 2,38E-02 | 2,47E-03 | 3,28E-02 | 3,43E-03 | 2,64E-02 | 3,32E-03 | PI [40:5]   | -0,157 | 3,83E-01 | -0,124 | 1,84E-01 | 0,341  | 2,09E-03 | -0,314 | 2,79E-03 |
| PI [40:4]   | 2,43E-02 | 3,93E-03 | 2,03E-02 | 6,24E-03 | 2,44E-02 | 3,09E-03 | 3,11E-02 | 3,56E-03 | 2,59E-02 | 2,61E-03 | PI [40:4]   | -0,258 | 1,48E-01 | 0,004  | 9,72E-01 | 0,354  | 4,13E-03 | -0,262 | 6,45E-03 |
| PE-O [36:5] | 5,61E-03 | 3,09E-03 | 1,02E-02 | 5,85E-03 | 4,32E-03 | 3,87E-03 | 5,49E-03 | 2,58E-03 | 5,84E-03 | 3,15E-03 | PE-O [36:5] | 0,856  | 1,11E-01 | -0,378 | 5,24E-01 | -0,031 | 9,40E-01 | 0,089  | 8,19E-01 |
| PE-O [38:7] | 3,27E-03 | 1,50E-03 | 5,67E-03 | 1,66E-03 | 2,56E-03 | 2,28E-03 | 4,47E-03 | 8,73E-04 | 3,92E-03 | 1,95E-03 | PE-O [38:7] | 0,792  | 2,56E-02 | -0,353 | 5,39E-01 | 0,450  | 2,50E-01 | -0,191 | 6,64E-01 |
| PE-O [38:6] | 2,99E-03 | 1,18E-03 | 3,19E-03 | 9,01E-04 | 2,84E-03 | 1,69E-03 | 2,82E-03 | 2,04E-03 | 3,56E-03 | 2,01E-03 | PE-O [38:6] | 0,095  | 7,53E-01 | -0,076 | 8,72E-01 | -0,084 | 8,84E-01 | 0,336  | 6,52E-01 |

|             |          |          |          |          |          |          |          |          |          |          |             |        |          |        |          |        |          |        |          |
|-------------|----------|----------|----------|----------|----------|----------|----------|----------|----------|----------|-------------|--------|----------|--------|----------|--------|----------|--------|----------|
| PE-O [38:5] | 4,60E-03 | 9,42E-04 | 4,71E-03 | 1,42E-03 | 4,35E-03 | 2,33E-03 | 4,93E-03 | 1,03E-03 | 5,13E-03 | 1,67E-03 | PE-O [38:5] | 0,034  | 8,60E-01 | -0,079 | 7,88E-01 | 0,102  | 5,59E-01 | 0,058  | 8,13E-01 |
| PE [30:1]   | 2,16E-02 | 4,02E-03 | 2,18E-02 | 7,07E-03 | 8,40E-03 | 3,96E-03 | 1,77E-02 | 8,24E-03 | 1,02E-02 | 4,46E-03 | PE [30:1]   | 0,010  | 9,58E-01 | -1,364 | 1,14E-05 | -0,289 | 2,53E-01 | -0,790 | 4,46E-02 |
| PE [30:0]   | 2,92E-03 | 1,87E-04 | 3,75E-03 | 1,24E-03 | 2,25E-03 | 9,80E-03 | 4,97E-03 | 1,42E-03 | 2,94E-03 | 8,51E-04 | PE [30:0]   | 0,358  | 1,06E-01 | -0,378 | 9,93E-02 | 0,765  | 3,33E-03 | -0,757 | 2,56E-02 |
| PE [32:2]   | 2,31E-01 | 4,20E-02 | 1,82E-01 | 6,11E-02 | 6,63E-02 | 2,81E-02 | 2,09E-01 | 7,95E-02 | 9,54E-02 | 5,38E-02 | PE [32:2]   | -0,347 | 8,04E-02 | -1,801 | 2,53E-07 | -0,147 | 4,99E-01 | -1,130 | 6,08E-03 |
| PE [32:1]   | 5,29E-01 | 1,00E-01 | 4,52E-01 | 1,36E-01 | 2,80E-01 | 1,00E-01 | 4,88E-01 | 1,24E-01 | 3,50E-01 | 1,04E-01 | PE [32:1]   | -0,228 | 2,17E-01 | -0,917 | 2,10E-04 | -0,115 | 4,95E-01 | -0,482 | 3,52E-02 |
| PE [32:0]   | 3,68E-02 | 7,02E-03 | 3,81E-02 | 9,96E-03 | 2,38E-02 | 6,88E-03 | 4,56E-02 | 6,48E-03 | 3,42E-02 | 7,03E-03 | PE [32:0]   | 0,050  | 7,69E-01 | -0,628 | 2,23E-03 | 0,310  | 2,58E-02 | -0,414 | 6,43E-03 |
| PE [34:3]   | 4,66E-01 | 8,67E-02 | 3,41E-01 | 1,21E-01 | 1,91E-01 | 7,40E-02 | 4,33E-01 | 1,17E-01 | 2,43E-01 | 8,66E-02 | PE [34:3]   | -0,447 | 3,35E-02 | -1,287 | 8,39E-06 | -0,105 | 5,48E-01 | -0,832 | 3,25E-03 |
| PE [34:2]   | 1,94E+00 | 2,82E-01 | 1,46E+00 | 4,85E-01 | 8,84E-01 | 3,12E-01 | 1,79E+00 | 4,27E-01 | 1,08E+00 | 3,34E-01 | PE [34:2]   | -0,410 | 3,00E-02 | -1,133 | 5,42E-06 | -0,112 | 4,47E-01 | -0,736 | 2,93E-03 |
| PE [34:1]   | 1,21E+00 | 2,02E-01 | 1,01E+00 | 2,96E-01 | 7,46E-01 | 2,47E-01 | 1,22E+00 | 1,63E-01 | 9,05E-01 | 1,96E-01 | PE [34:1]   | -0,263 | 1,32E-01 | -0,704 | 9,64E-04 | 0,001  | 9,94E-01 | -0,426 | 5,67E-03 |
| PE [34:0]   | 3,52E-02 | 7,91E-03 | 3,77E-02 | 1,09E-02 | 3,28E-02 | 9,74E-03 | 5,38E-02 | 1,30E-03 | 4,30E-02 | 1,01E-02 | PE [34:0]   | 0,097  | 6,14E-01 | -0,105 | 5,85E-01 | 0,610  | 4,86E-03 | -0,321 | 9,55E-02 |
| PE [36:6]   | 4,93E-02 | 1,75E-02 | 5,48E-02 | 1,83E-02 | 1,38E-02 | 5,54E-03 | 4,04E-02 | 1,87E-02 | 2,38E-02 | 1,55E-02 | PE [36:6]   | 0,154  | 5,45E-01 | -1,837 | 8,38E-05 | -0,287 | 3,60E-01 | -0,763 | 8,27E-02 |
| PE [36:5]   | 3,39E-01 | 9,67E-02 | 3,61E-01 | 1,18E-01 | 1,53E-01 | 5,68E-02 | 3,00E-01 | 8,05E-02 | 2,09E-01 | 8,59E-02 | PE [36:5]   | 0,087  | 7,00E-01 | -1,153 | 3,35E-04 | -0,175 | 4,17E-01 | -0,526 | 5,33E-02 |
| PE [36:4]   | 1,38E+00 | 2,77E-01 | 1,26E+00 | 3,75E-01 | 7,61E-01 | 2,55E-01 | 1,30E+00 | 2,25E-01 | 9,52E-01 | 2,35E-01 | PE [36:4]   | -0,136 | 4,64E-01 | -0,861 | 3,64E-04 | -0,089 | 5,42E-01 | -0,450 | 1,20E-02 |
| PE [36:3]   | 2,15E+00 | 3,38E-01 | 1,40E+00 | 5,62E-01 | 1,26E+00 | 4,25E-01 | 2,11E+00 | 2,39E-01 | 1,50E+00 | 2,50E-01 | PE [36:3]   | -0,616 | 6,20E-03 | -0,775 | 3,73E-04 | -0,025 | 8,14E-01 | -0,498 | 3,09E-04 |
| PE [36:2]   | 2,10E+00 | 3,21E-01 | 1,60E+00 | 5,25E-01 | 1,18E+00 | 3,89E-01 | 2,07E+00 | 2,62E-01 | 1,43E+00 | 3,10E-01 | PE [36:2]   | -0,394 | 3,68E-02 | -0,832 | 1,45E-04 | -0,022 | 8,38E-01 | -0,532 | 9,25E-04 |
| PE [36:1]   | 5,19E-01 | 9,46E-02 | 3,90E-01 | 1,25E-01 | 3,65E-01 | 1,13E-01 | 5,58E-01 | 3,21E-02 | 4,38E-01 | 7,27E-02 | PE [36:1]   | -0,413 | 3,54E-02 | -0,509 | 1,02E-02 | 0,105  | 3,19E-01 | -0,348 | 1,48E-03 |
| PE [38:7]   | 1,67E-01 | 4,26E-02 | 1,79E-01 | 5,76E-02 | 6,46E-02 | 2,56E-02 | 1,59E-01 | 4,86E-02 | 9,82E-02 | 4,69E-02 | PE [38:7]   | 0,102  | 6,38E-01 | -1,369 | 4,46E-05 | -0,069 | 7,46E-01 | -0,696 | 2,83E-02 |
| PE [38:6]   | 7,61E-01 | 2,03E-01 | 7,39E-01 | 2,27E-01 | 4,61E-01 | 1,70E-01 | 7,05E-01 | 1,53E-01 | 6,05E-01 | 1,85E-01 | PE [38:6]   | -0,041 | 8,47E-01 | -0,724 | 6,29E-03 | -0,110 | 5,64E-01 | -0,221 | 2,78E-01 |
| PE [38:5]   | 1,53E+00 | 2,47E-01 | 1,39E+00 | 4,01E-01 | 8,84E-01 | 2,65E-01 | 1,45E+00 | 1,73E-01 | 1,08E+00 | 2,18E-01 | PE [38:5]   | -0,136 | 4,24E-01 | -0,788 | 1,89E-04 | -0,076 | 4,95E-01 | -0,422 | 3,36E-03 |
| PE [38:4]   | 2,61E+00 | 3,98E-01 | 2,01E+00 | 6,43E-01 | 1,76E+00 | 5,64E-01 | 2,67E+00 | 2,41E-01 | 2,14E+00 | 3,42E-01 | PE [38:4]   | -0,378 | 4,10E-02 | -0,569 | 3,62E-03 | 0,031  | 7,50E-01 | -0,320 | 4,56E-03 |
| PE [38:3]   | 1,52E+00 | 2,76E-01 | 8,12E-01 | 4,65E-01 | 1,10E+00 | 3,63E-01 | 1,64E+00 | 7,71E-02 | 1,29E+00 | 1,46E-01 | PE [38:3]   | -0,901 | 2,48E-03 | -0,456 | 2,32E-02 | 0,114  | 2,72E-01 | -0,346 | 7,73E-05 |
| PE [38:2]   | 1,28E-01 | 1,98E-02 | 8,84E-02 | 3,23E-02 | 1,12E-02 | 3,11E-02 | 1,38E-01 | 1,50E-02 | 1,28E-01 | 6,98E-03 | PE [38:2]   | -0,531 | 1,09E-02 | -0,186 | 2,56E-01 | 0,114  | 2,72E-01 | -0,109 | 1,11E-01 |
| PE [38:1]   | 2,42E-02 | 6,02E-03 | 1,46E-02 | 6,49E-03 | 2,03E-02 | 6,74E-03 | 2,63E-02 | 4,15E-03 | 2,45E-02 | 3,15E-03 | PE [38:1]   | -0,733 | 8,16E-03 | -0,254 | 2,42E-01 | 0,121  | 4,48E-01 | -0,102 | 3,58E-01 |
| PE [40:7]   | 5,60E-01 | 1,03E-01 | 4,62E-01 | 1,43E-01 | 3,46E-01 | 1,11E-01 | 5,46E-01 | 7,69E-02 | 4,36E-01 | 9,18E-02 | PE [40:7]   | -0,276 | 1,40E-01 | -0,695 | 1,28E-03 | -0,037 | 7,70E-01 | -0,325 | 2,70E-02 |
| PE [40:6]   | 4,39E-01 | 6,82E-02 | 3,18E-01 | 1,22E-01 | 3,15E-01 | 1,00E-01 | 4,56E-01 | 4,64E-02 | 3,97E-01 | 7,18E-02 | PE [40:6]   | -0,466 | 2,77E-02 | -0,478 | 1,19E-02 | 0,055  | 5,87E-01 | -0,202 | 8,39E-02 |
| PE [40:5]   | 1,04E-01 | 1,32E-02 | 7,08E-02 | 2,43E-02 | 7,07E-02 | 2,02E-02 | 1,05E-01 | 4,61E-03 | 8,35E-02 | 9,51E-03 | PE [40:5]   | -0,556 | 4,23E-03 | -0,558 | 1,57E-03 | 0,017  | 8,17E-01 | -0,335 | 9,98E-05 |

|                            |          |          |          |          |          |          |          |          |          |          |                            |        |          |        |          |        |          |        |          |
|----------------------------|----------|----------|----------|----------|----------|----------|----------|----------|----------|----------|----------------------------|--------|----------|--------|----------|--------|----------|--------|----------|
| PE [40:4]                  | 3,80E-02 | 8,63E-03 | 2,21E-02 | 1,32E-02 | 3,14E-02 | 9,80E-03 | 4,40E-02 | 1,93E-03 | 3,58E-02 | 4,40E-03 | PE [40:4]                  | -0,780 | 1,30E-02 | -0,276 | 1,74E-01 | 0,212  | 9,52E-02 | -0,296 | 5,67E-04 |
| PS [32:2],PS [16:1 / 16:1] | 4,44E-02 | 1,24E-02 | 4,09E-02 | 1,49E-02 | 3,72E-02 | 1,42E-02 | 6,40E-02 | 3,85E-02 | 3,93E-02 | 8,47E-03 | PS [32:2],PS [16:1 / 16:1] | -0,120 | 6,13E-01 | -0,255 | 2,98E-01 | 0,526  | 1,95E-01 | -0,703 | 9,94E-02 |
| PS [32:1],PS [14:0 / 18:1] | 2,35E-03 | 8,11E-04 | 3,35E-03 | 1,32E-03 | 1,47E-03 | 1,01E-03 | 3,12E-03 | 1,25E-03 | 1,80E-03 | 6,94E-04 | PS [32:1],PS [14:0 / 18:1] | 0,512  | 1,07E-01 | -0,683 | 8,55E-02 | 0,406  | 1,99E-01 | -0,793 | 2,32E-02 |
| PS [32:1],PS [16:0 / 16:1] | 5,00E-01 | 9,50E-02 | 4,98E-01 | 1,53E-01 | 3,59E-01 | 9,08E-02 | 5,10E-01 | 9,15E-02 | 3,83E-01 | 5,74E-02 | PS [32:1],PS [16:0 / 16:1] | -0,005 | 9,79E-01 | -0,476 | 9,07E-03 | 0,028  | 8,45E-01 | -0,412 | 6,20E-03 |
| PS [32:1],PS [17:1 / 15:0] | 8,18E-04 | 5,37E-04 | 9,48E-04 | 6,53E-04 | 3,33E-04 | 4,32E-04 | 1,63E-03 | 1,25E-03 | 1,15E-03 | 7,10E-04 | PS [32:1],PS [17:1 / 15:0] | 0,213  | 6,69E-01 | -1,296 | 6,66E-02 | 0,993  | 1,20E-01 | -0,498 | 3,75E-01 |
| PS [32:0],PS [14:0 / 18:0] | 8,99E-03 | 2,59E-03 | 9,71E-03 | 3,80E-03 | 4,16E-03 | 6,95E-04 | 1,19E-02 | 1,03E-02 | 5,19E-03 | 2,42E-03 | PS [32:0],PS [14:0 / 18:0] | 0,111  | 6,66E-01 | -1,113 | 1,64E-04 | 0,405  | 4,52E-01 | -1,199 | 9,61E-02 |
| PS [32:0],PS [17:0 / 15:0] | 5,27E-04 | 6,92E-04 | 7,47E-04 | 4,51E-04 | 2,34E-04 | 3,54E-04 | 5,69E-04 | 5,05E-04 | 3,43E-04 | 3,16E-04 | PS [32:0],PS [17:0 / 15:0] | 0,504  | 4,63E-01 | -1,170 | 3,05E-01 | 0,110  | 8,98E-01 | -0,730 | 3,11E-01 |
| PS [34:3],PS [16:2 / 18:1] | 4,99E-02 | 1,11E-02 | 4,59E-02 | 1,66E-02 | 4,02E-02 | 9,81E-03 | 7,48E-02 | 4,20E-02 | 4,38E-02 | 6,99E-03 | PS [34:3],PS [16:2 / 18:1] | -0,121 | 5,78E-01 | -0,314 | 8,32E-02 | 0,583  | 1,30E-01 | -0,771 | 5,98E-02 |
| PS [34:3],PS [16:1 / 18:2] | 3,24E-02 | 6,87E-03 | 2,89E-02 | 1,19E-02 | 2,62E-02 | 6,47E-03 | 4,25E-02 | 2,48E-02 | 2,89E-02 | 4,70E-03 | PS [34:3],PS [16:1 / 18:2] | -0,161 | 4,92E-01 | -0,306 | 8,47E-02 | 0,392  | 2,85E-01 | -0,557 | 1,50E-01 |
| PS [34:3],PS [16:0 / 18:3] | 5,60E-02 | 9,35E-03 | 5,35E-02 | 1,80E-02 | 3,98E-02 | 9,43E-03 | 6,16E-02 | 1,17E-02 | 4,15E-02 | 6,43E-03 | PS [34:3],PS [16:0 / 18:3] | -0,065 | 7,35E-01 | -0,493 | 3,90E-03 | 0,137  | 3,24E-01 | -0,571 | 1,01E-03 |
| PS [34:2],PS [16:1 / 18:1] | 1,82E-01 | 3,10E-02 | 1,83E-01 | 6,23E-02 | 1,54E-01 | 4,14E-02 | 2,18E-01 | 6,56E-02 | 1,61E-01 | 2,23E-02 | PS [34:2],PS [16:1 / 18:1] | 0,008  | 9,67E-01 | -0,240 | 1,51E-01 | 0,260  | 1,89E-01 | -0,431 | 3,97E-02 |
| PS [34:2],PS [16:0 / 18:2] | 1,49E-01 | 2,56E-02 | 1,40E-01 | 4,92E-02 | 1,20E-01 | 3,93E-02 | 1,69E-01 | 4,74E-02 | 1,28E-01 | 2,11E-02 | PS [34:2],PS [16:0 / 18:2] | -0,091 | 6,48E-01 | -0,318 | 9,67E-02 | 0,181  | 3,19E-01 | -0,399 | 4,57E-02 |
| PS [34:2],PS [17:1 / 17:1] | 4,49E-03 | 2,35E-03 | 3,66E-03 | 1,49E-03 | 3,94E-03 | 1,95E-03 | 6,43E-03 | 6,03E-03 | 3,93E-03 | 1,13E-03 | PS [34:2],PS [17:1 / 17:1] | -0,298 | 4,09E-01 | -0,188 | 6,19E-01 | 0,517  | 4,15E-01 | -0,710 | 2,68E-01 |
| PS [34:1],PS [16:1 / 18:0] | 7,49E-01 | 1,73E-01 | 7,09E-01 | 2,64E-01 | 5,34E-01 | 1,89E-01 | 8,27E-01 | 2,46E-01 | 6,40E-01 | 1,68E-01 | PS [34:1],PS [16:1 / 18:0] | -0,079 | 7,26E-01 | -0,489 | 3,22E-02 | 0,143  | 4,84E-01 | -0,371 | 1,05E-01 |
| PS [34:1],PS [16:0 / 18:1] | 3,05E-01 | 8,13E-02 | 3,53E-01 | 1,21E-01 | 1,99E-01 | 7,60E-02 | 2,78E-01 | 1,02E-01 | 2,30E-01 | 8,15E-02 | PS [34:1],PS [16:0 / 18:1] | 0,210  | 3,68E-01 | -0,622 | 1,66E-02 | -0,134 | 5,78E-01 | -0,274 | 3,29E-01 |
| PS [34:1],PS [17:0 / 17:1] | 3,71E-03 | 2,20E-03 | 3,40E-03 | 1,03E-03 | 3,07E-03 | 2,08E-03 | 5,35E-03 | 4,04E-03 | 3,50E-03 | 1,40E-03 | PS [34:1],PS [17:0 / 17:1] | -0,124 | 7,27E-01 | -0,273 | 5,59E-01 | 0,529  | 3,36E-01 | -0,615 | 2,42E-01 |
| PS [34:0],PS [16:0 / 18:0] | 1,56E-01 | 6,03E-02 | 1,36E-01 | 3,82E-02 | 1,05E-01 | 3,97E-02 | 2,13E-01 | 1,97E-01 | 1,28E-01 | 3,50E-02 | PS [34:0],PS [16:0 / 18:0] | -0,206 | 4,24E-01 | -0,575 | 6,38E-02 | 0,443  | 4,56E-01 | -0,734 | 2,52E-01 |
| PS [36:5],PS [16:1 / 20:4] | 3,83E-02 | 1,22E-02 | 4,14E-02 | 1,65E-02 | 3,63E-02 | 1,37E-02 | 6,53E-02 | 5,22E-02 | 4,37E-02 | 7,09E-03 | PS [36:5],PS [16:1 / 20:4] | 0,113  | 6,75E-01 | -0,077 | 7,62E-01 | 0,770  | 1,77E-01 | -0,580 | 2,65E-01 |
| PS [36:5],PS [20:5 / 16:0] | 2,91E-02 | 5,95E-03 | 3,26E-02 | 1,30E-02 | 3,02E-02 | 9,74E-03 | 4,51E-02 | 2,58E-02 | 3,55E-02 | 5,46E-03 | PS [36:5],PS [20:5 / 16:0] | 0,160  | 5,10E-01 | 0,051  | 8,00E-01 | 0,631  | 1,11E-01 | -0,349 | 3,17E-01 |
| PS [36:5],PS [18:2 / 18:3] | 5,71E-03 | 1,15E-03 | 4,81E-03 | 1,69E-03 | 3,96E-03 | 1,50E-03 | 6,69E-03 | 4,18E-03 | 4,35E-03 | 6,41E-04 | PS [36:5],PS [18:2 / 18:3] | -0,248 | 2,32E-01 | -0,529 | 2,00E-02 | 0,228  | 5,34E-01 | -0,622 | 1,40E-01 |
| PS [36:3],PS [20:3 / 16:0] | 1,93E-01 | 2,65E-02 | 1,71E-01 | 5,82E-02 | 1,63E-01 | 4,63E-02 | 2,35E-01 | 3,05E-02 | 1,72E-01 | 2,45E-02 | PS [36:3],PS [20:3 / 16:0] | -0,173 | 3,51E-01 | -0,237 | 1,44E-01 | 0,290  | 1,21E-02 | -0,453 | 6,29E-04 |
| PS [36:3],PS [16:1 / 20:2] | 1,64E-02 | 2,51E-03 | 1,43E-02 | 5,90E-03 | 1,18E-02 | 3,33E-03 | 2,11E-02 | 7,82E-03 | 1,37E-02 | 2,33E-03 | PS [36:3],PS [16:1 / 20:2] | -0,202 | 3,60E-01 | -0,480 | 7,10E-03 | 0,362  | 1,32E-01 | -0,622 | 2,41E-02 |
| PS [36:3],PS [18:1 / 18:2] | 8,07E-02 | 1,37E-02 | 7,33E-02 | 2,73E-02 | 7,04E-02 | 1,85E-02 | 9,34E-02 | 2,23E-02 | 7,64E-02 | 1,01E-02 | PS [36:3],PS [18:1 / 18:2] | -0,140 | 5,00E-01 | -0,198 | 2,23E-01 | 0,210  | 2,01E-01 | -0,289 | 7,38E-02 |
| PS [36:3],PS [18:0 / 18:3] | 1,23E-01 | 2,67E-02 | 1,13E-01 | 4,21E-02 | 9,15E-02 | 2,73E-02 | 1,42E-01 | 2,40E-02 | 1,11E-01 | 2,60E-02 | PS [36:3],PS [18:0 / 18:3] | -0,115 | 6,01E-01 | -0,424 | 3,67E-02 | 0,208  | 1,73E-01 | -0,348 | 3,60E-02 |
| PS [36:2],PS [16:1 / 20:1] | 3,02E-02 | 4,92E-03 | 2,95E-02 | 9,83E-03 | 2,52E-02 | 6,30E-03 | 3,72E-02 | 1,48E-02 | 2,82E-02 | 4,31E-03 | PS [36:2],PS [16:1 / 20:1] | -0,036 | 8,50E-01 | -0,264 | 9,56E-02 | 0,302  | 2,25E-01 | -0,402 | 1,21E-01 |
| PS [36:2],PS [18:1 / 18:1] | 1,00E-01 | 2,01E-02 | 1,10E-01 | 3,42E-02 | 7,72E-02 | 2,21E-02 | 1,02E-01 | 3,09E-02 | 8,39E-02 | 2,06E-02 | PS [36:2],PS [18:1 / 18:1] | 0,142  | 4,71E-01 | -0,374 | 4,80E-02 | 0,026  | 8,92E-01 | -0,280 | 2,02E-01 |

|                            |          |          |          |          |          |          |          |          |          |          |                            |        |          |        |          |        |          |        |          |
|----------------------------|----------|----------|----------|----------|----------|----------|----------|----------|----------|----------|----------------------------|--------|----------|--------|----------|--------|----------|--------|----------|
| PS [36:2],PS [18:0 / 18:2] | 4,31E-01 | 1,00E-01 | 3,88E-01 | 1,58E-01 | 3,63E-01 | 1,17E-01 | 5,07E-01 | 1,24E-01 | 4,29E-01 | 1,05E-01 | PS [36:2],PS [18:0 / 18:2] | -0,152 | 5,24E-01 | -0,247 | 2,34E-01 | 0,235  | 2,10E-01 | -0,242 | 2,08E-01 |
| PS [36:1],PS [20:0 / 16:1] | 7,89E-01 | 1,17E-01 | 7,16E-01 | 2,64E-01 | 6,31E-01 | 1,68E-01 | 1,13E+00 | 5,83E-01 | 7,00E-01 | 3,87E-02 | PS [36:1],PS [20:0 / 16:1] | -0,140 | 4,85E-01 | -0,322 | 4,64E-02 | 0,517  | 1,29E-01 | -0,690 | 5,69E-02 |
| PS [36:1],PS [18:1 / 18:0] | 6,38E-01 | 1,74E-01 | 6,28E-01 | 2,50E-01 | 4,12E-01 | 1,63E-01 | 6,77E-01 | 3,46E-01 | 5,39E-01 | 2,06E-01 | PS [36:1],PS [18:1 / 18:0] | -0,023 | 9,26E-01 | -0,630 | 1,80E-02 | 0,086  | 7,82E-01 | -0,328 | 3,59E-01 |
| PS [36:0],PS [18:0 / 18:0] | 7,63E-02 | 1,30E-02 | 4,64E-02 | 2,15E-02 | 6,46E-02 | 1,60E-02 | 1,19E-01 | 8,90E-02 | 7,18E-02 | 1,20E-02 | PS [36:0],PS [18:0 / 18:0] | -0,718 | 4,58E-03 | -0,240 | 1,30E-01 | 0,641  | 2,01E-01 | -0,728 | 1,60E-01 |
| PS [38:4],PS [20:3 / 18:1] | 1,11E-01 | 1,47E-02 | 9,02E-02 | 3,30E-02 | 9,55E-02 | 2,63E-02 | 1,31E-01 | 2,80E-02 | 1,04E-01 | 9,21E-03 | PS [38:4],PS [20:3 / 18:1] | -0,301 | 1,24E-01 | -0,217 | 1,67E-01 | 0,240  | 9,99E-02 | -0,335 | 2,22E-02 |
| PS [38:4],PS [16:1 / 22:3] | 5,14E-03 | 8,55E-04 | 4,96E-03 | 1,87E-03 | 5,95E-03 | 1,45E-03 | 5,99E-03 | 1,35E-03 | 5,99E-03 | 7,65E-04 | PS [38:4],PS [16:1 / 22:3] | -0,051 | 8,11E-01 | 0,211  | 1,95E-01 | 0,222  | 1,61E-01 | -0,001 | 9,96E-01 |
| PS [38:4],PS [20:2 / 18:2] | 5,68E-03 | 9,07E-04 | 3,95E-03 | 1,93E-03 | 3,81E-03 | 1,30E-03 | 6,05E-03 | 1,99E-03 | 4,29E-03 | 7,64E-04 | PS [38:4],PS [20:2 / 18:2] | -0,525 | 3,77E-02 | -0,574 | 4,98E-03 | 0,093  | 6,35E-01 | -0,498 | 3,63E-02 |
| PS [38:4],PS [20:1 / 18:3] | 1,80E-03 | 6,28E-04 | 1,55E-03 | 6,36E-04 | 1,12E-03 | 6,12E-04 | 2,11E-03 | 1,14E-03 | 1,38E-03 | 4,72E-04 | PS [38:4],PS [20:1 / 18:3] | -0,219 | 4,35E-01 | -0,689 | 4,43E-02 | 0,228  | 5,18E-01 | -0,609 | 1,20E-01 |
| PS [38:4],PS [18:0 / 20:4] | 2,69E-01 | 6,43E-02 | 3,52E-01 | 1,30E-01 | 3,48E-01 | 9,87E-02 | 3,86E-01 | 1,50E-01 | 4,37E-01 | 1,04E-01 | PS [38:4],PS [18:0 / 20:4] | 0,388  | 1,28E-01 | 0,372  | 7,86E-02 | 0,524  | 6,46E-02 | 0,177  | 4,58E-01 |
| PS [38:3],PS [16:1 / 22:2] | 3,61E-02 | 3,83E-03 | 3,28E-02 | 1,05E-02 | 3,30E-02 | 8,63E-03 | 4,49E-02 | 1,73E-02 | 3,39E-02 | 3,94E-03 | PS [38:3],PS [16:1 / 22:2] | -0,137 | 4,22E-01 | -0,131 | 3,64E-01 | 0,314  | 1,85E-01 | -0,404 | 1,04E-01 |
| PS [38:3],PS [20:3 / 18:0] | 6,14E-01 | 1,11E-01 | 5,04E-01 | 2,24E-01 | 5,24E-01 | 1,59E-01 | 7,26E-01 | 1,35E-01 | 6,08E-01 | 9,95E-02 | PS [38:3],PS [20:3 / 18:0] | -0,286 | 2,33E-01 | -0,230 | 2,07E-01 | 0,241  | 1,01E-01 | -0,256 | 7,35E-02 |
| PS [38:3],PS [20:1 / 18:2] | 7,98E-03 | 1,17E-03 | 7,47E-03 | 2,84E-03 | 7,06E-03 | 2,23E-03 | 9,06E-03 | 2,50E-03 | 7,82E-03 | 1,43E-03 | PS [38:3],PS [20:1 / 18:2] | -0,096 | 6,42E-01 | -0,177 | 3,17E-01 | 0,182  | 2,96E-01 | -0,212 | 2,53E-01 |
| PS [38:3],PS [18:1 / 20:2] | 1,68E-02 | 2,91E-03 | 1,44E-02 | 5,46E-03 | 1,53E-02 | 5,80E-03 | 1,85E-02 | 5,18E-03 | 1,50E-02 | 3,11E-03 | PS [38:3],PS [18:1 / 20:2] | -0,226 | 2,85E-01 | -0,129 | 5,40E-01 | 0,137  | 4,47E-01 | -0,298 | 1,36E-01 |
| PS [38:2],PS [16:1 / 22:1] | 2,16E-01 | 3,08E-02 | 1,72E-01 | 5,86E-02 | 2,07E-01 | 5,89E-02 | 2,82E-01 | 1,05E-01 | 1,98E-01 | 2,33E-02 | PS [38:2],PS [16:1 / 22:1] | -0,323 | 8,57E-02 | -0,056 | 7,32E-01 | 0,389  | 1,07E-01 | -0,514 | 4,35E-02 |
| PS [38:2],PS [20:1 / 18:1] | 2,52E-02 | 4,86E-03 | 2,22E-02 | 7,90E-03 | 2,22E-02 | 6,14E-03 | 2,94E-02 | 1,17E-02 | 2,34E-02 | 2,85E-03 | PS [38:2],PS [20:1 / 18:1] | -0,188 | 3,63E-01 | -0,188 | 2,85E-01 | 0,220  | 3,73E-01 | -0,327 | 1,83E-01 |
| PS [40:6],PS [20:3 / 20:3] | 9,19E-03 | 2,02E-03 | 4,94E-03 | 2,39E-03 | 5,67E-03 | 1,70E-03 | 9,10E-03 | 3,53E-03 | 6,73E-03 | 1,05E-03 | PS [40:6],PS [20:3 / 20:3] | -0,895 | 1,79E-03 | -0,697 | 2,04E-03 | -0,015 | 9,49E-01 | -0,434 | 9,29E-02 |
| PS [40:6],PS [20:2 / 20:4] | 7,43E-03 | 2,54E-03 | 6,30E-03 | 1,56E-03 | 6,45E-03 | 2,15E-03 | 7,91E-03 | 3,47E-03 | 6,69E-03 | 1,84E-03 | PS [40:6],PS [20:2 / 20:4] | -0,240 | 2,99E-01 | -0,205 | 4,17E-01 | 0,090  | 7,64E-01 | -0,243 | 4,00E-01 |
| PS [40:6],PS [18:1 / 22:5] | 2,25E-02 | 8,11E-03 | 1,44E-02 | 7,17E-03 | 1,56E-02 | 8,62E-03 | 2,51E-02 | 8,67E-03 | 1,17E-02 | 6,99E-03 | PS [40:6],PS [18:1 / 22:5] | -0,647 | 5,16E-02 | -0,526 | 1,22E-01 | 0,156  | 5,63E-01 | -1,102 | 5,54E-03 |
| PS [40:5],PS [20:3 / 20:2] | 1,00E-02 | 2,59E-03 | 4,75E-03 | 3,33E-03 | 5,65E-03 | 1,09E-03 | 9,42E-03 | 2,90E-03 | 6,63E-03 | 1,90E-03 | PS [40:5],PS [20:3 / 20:2] | -1,079 | 3,27E-03 | -0,829 | 5,99E-04 | -0,091 | 6,73E-01 | -0,508 | 4,33E-02 |
| PS [40:5],PS [20:1 / 20:4] | 2,83E-03 | 8,72E-04 | 3,79E-03 | 1,51E-03 | 3,24E-03 | 8,56E-04 | 2,94E-03 | 1,25E-03 | 4,80E-03 | 1,40E-03 | PS [40:5],PS [20:1 / 20:4] | 0,423  | 1,41E-01 | 0,195  | 3,59E-01 | 0,058  | 8,37E-01 | 0,705  | 1,85E-02 |
| PS [40:5],PS [18:0 / 22:5] | 8,29E-02 | 1,93E-02 | 6,14E-02 | 2,17E-02 | 7,10E-02 | 2,24E-02 | 9,22E-02 | 1,74E-02 | 7,25E-02 | 1,71E-02 | PS [40:5],PS [18:0 / 22:5] | -0,432 | 5,54E-02 | -0,222 | 2,77E-01 | 0,154  | 3,46E-01 | -0,348 | 4,56E-02 |
| PS [40:4],PS [20:3 / 20:1] | 7,17E-03 | 1,08E-03 | 5,05E-03 | 1,87E-03 | 5,51E-03 | 2,05E-03 | 6,89E-03 | 1,68E-03 | 6,39E-03 | 1,27E-03 | PS [40:4],PS [20:3 / 20:1] | -0,506 | 1,50E-02 | -0,379 | 6,24E-02 | -0,057 | 7,08E-01 | -0,110 | 5,19E-01 |
| PS [40:4],PS [22:4 / 18:0] | 2,29E-02 | 2,76E-03 | 1,79E-02 | 7,60E-03 | 1,87E-02 | 4,44E-03 | 2,60E-02 | 3,39E-03 | 2,05E-02 | 3,32E-03 | PS [40:4],PS [22:4 / 18:0] | -0,359 | 9,91E-02 | -0,291 | 4,01E-02 | 0,182  | 7,37E-02 | -0,343 | 7,30E-03 |
| LPL                        | 1,82E+00 | 4,62E-01 | 1,67E+00 | 3,17E-01 | 1,26E+00 | 4,19E-01 | 2,33E+00 | 2,01E-01 | 1,57E+00 | 2,48E-01 | LPL                        | -0,127 | 4,52E-01 | -0,532 | 2,33E-02 | 0,354  | 1,89E-02 | -0,565 | 2,32E-05 |
| LPC                        | 8,90E-01 | 2,21E-01 | 8,00E-01 | 9,76E-02 | 6,82E-01 | 2,32E-01 | 1,07E+00 | 9,05E-02 | 7,90E-01 | 9,11E-02 | LPC                        | -0,155 | 3,06E-01 | -0,386 | 8,65E-02 | 0,271  | 6,10E-02 | -0,443 | 4,12E-05 |

|     |          |          |          |          |          |          |          |          |          |          |     |        |          |        |          |        |          |        |          |
|-----|----------|----------|----------|----------|----------|----------|----------|----------|----------|----------|-----|--------|----------|--------|----------|--------|----------|--------|----------|
| LPE | 8,28E-01 | 2,61E-01 | 7,58E-01 | 2,11E-01 | 5,00E-01 | 1,82E-01 | 1,09E+00 | 1,60E-01 | 6,86E-01 | 1,82E-01 | LPE | -0,128 | 5,63E-01 | -0,728 | 1,12E-02 | 0,403  | 3,59E-02 | -0,674 | 5,12E-04 |
| LPI | 1,03E-01 | 2,28E-02 | 1,11E-01 | 2,78E-02 | 7,77E-02 | 1,74E-02 | 1,59E-01 | 3,20E-02 | 9,74E-02 | 2,26E-02 | LPI | 0,109  | 5,35E-01 | -0,403 | 2,74E-02 | 0,630  | 1,63E-03 | -0,705 | 7,92E-04 |
| ML  | 1,25E+02 | 2,00E+01 | 1,04E+02 | 2,92E+01 | 9,92E+01 | 2,47E+01 | 1,33E+02 | 1,40E+01 | 1,14E+02 | 1,05E+01 | ML  | -0,265 | 1,16E-01 | -0,331 | 3,93E-02 | 0,094  | 3,71E-01 | -0,223 | 1,02E-02 |
| NL  | 3,87E+01 | 7,90E+00 | 3,44E+01 | 9,36E+00 | 3,67E+01 | 1,23E+01 | 4,76E+01 | 1,58E+01 | 4,00E+01 | 8,66E+00 | NL  | -0,169 | 3,40E-01 | -0,075 | 7,11E-01 | 0,300  | 1,81E-01 | -0,253 | 2,56E-01 |
| PA  | 2,65E-01 | 5,23E-02 | 2,05E-01 | 9,29E-02 | 7,73E-02 | 2,00E-02 | 1,34E-01 | 6,32E-02 | 9,24E-02 | 2,82E-02 | PA  | -0,367 | 1,37E-01 | -1,776 | 1,84E-07 | -0,978 | 7,59E-04 | -0,540 | 1,13E-01 |
| PG  | 2,29E-01 | 6,63E-02 | 2,73E-01 | 4,43E-02 | 1,82E-01 | 4,70E-02 | 4,09E-01 | 1,90E-01 | 2,34E-01 | 5,14E-02 | PG  | 0,256  | 1,37E-01 | -0,331 | 1,25E-01 | 0,840  | 2,50E-02 | -0,808 | 2,54E-02 |
| Cer | 1,32E-01 | 5,37E-02 | 1,23E-01 | 4,73E-02 | 2,30E-01 | 8,34E-02 | 2,36E-01 | 7,38E-02 | 2,89E-01 | 6,74E-02 | Cer | -0,098 | 7,38E-01 | 0,803  | 1,42E-02 | 0,839  | 7,65E-03 | 0,292  | 1,70E-01 |

<sup>a</sup> Lipid abundancies are given in arbitrary units with mean values (AV) and standard error of the mean (SEM). The following abbreviations are used: sphingomyelin (SM), diacylglycerol (DAG), ceramide (Cer), triacylglycerol (TAG), phosphatidylcholine (PC), cholesterol (Chol), lysophosphatidylcholine (LPC), lysophosphatidylethanolamine (LPE), lysophosphatidylinositol (LPI), phosphatidic acid (PA), phosphatidylglycerol (PG), phosphatidylinositol (PI), phosphatidylethanolamine (PE), phosphatidylserine (PS), lysophospholipid (LPL), membrane lipid (ML), neutral lipid (NL).

<sup>b</sup> log<sub>2</sub>-fold changes of >0.5 and <-0.5 are indicated in blue and red, respectively.

<sup>c</sup> Significant changes with p<0.05 (as determined by two-tailed unpaired Student's *t* test) are indicated in red.

**Suppl. Table 2.** Lipids and standards used in this study.

| Lipid                                                                           | Avanti Polar Lipids Catalog Nr. | pmol added |
|---------------------------------------------------------------------------------|---------------------------------|------------|
| 18:0 Diether PC,<br>1,2-di-O-octadecyl-sn-glycero-3-phosphocholine              | 999991                          | 72.47      |
| 4ME 16:0 Diether PE,<br>1,2-di-O-phytanyl-sn-glycero-3-phosphoethanolamine      | 999985                          | 122.7      |
| 17:0 SM (d18:1/17:0),<br>N-heptadecanoyl-D-erythro-sphingosylphosphorylcholine  | 860585                          | 57.38      |
| 17:0 Lyso PC,<br>1-heptadecanoyl-sn-glycero-3-phosphocholine                    | 110686                          | 121.46     |
| C17 Ceramide (d18:1/17:0),<br>N-heptadecanoyl-D-erythro-sphingosine             | 860517                          | 179.46     |
| 17:0 cholesteryl ester,<br>cholest-5-en-3 $\beta$ -yl heptadecanoate            | 110864                          | 134.12     |
| 17:0-17:1-17:0 D5 TG,<br>1,3(d5)-diheptadecanoyl-2-(10Z-heptadecenoyl)-glycerol | 110544                          | 44.69      |
| 17:0 PS,<br>1,2-diheptadecanoyl-sn-glycero-3-phospho-L-serine                   | 840028                          | 68.34      |
| Chol-D7,<br>cholesterol-d7                                                      | 700041                          | 969.34     |

| Lipid class     | Standard(s) used to determine quantities / abundances                                                                                                   | Ionization mode | Mode                      | Ion species <sup>a</sup>          |
|-----------------|---------------------------------------------------------------------------------------------------------------------------------------------------------|-----------------|---------------------------|-----------------------------------|
| PE / PE-O       | 4ME 16:0 Diether PE                                                                                                                                     | neg             | MS <sup>1</sup>           | [M-H] <sup>-</sup>                |
| LPE             | 4ME 16:0 Diether PE                                                                                                                                     | neg             | MS <sup>1</sup>           | [M-H] <sup>-</sup>                |
| LPI, PA, PG, PI | 4ME 16:0 Diether PE + 17:0 SM (d18:1/17:0) + C17 Ceramide (d18:1/17:0)                                                                                  | neg             | MS <sup>1</sup>           | [M-H] <sup>-</sup>                |
| PS              | 17:0 PS                                                                                                                                                 | neg             | MS <sup>2</sup> - FAS     | [FA-H] <sup>-</sup>               |
| LPC             | 17:0 Lyso PC                                                                                                                                            | pos             | MS <sup>1</sup>           | [M+H] <sup>+</sup>                |
| PC / PC-O       | 18:0 Diether PC                                                                                                                                         | pos             | MS <sup>1</sup>           | [M+H] <sup>+</sup>                |
| SM              | 17:0 SM (d18:1/17:0)                                                                                                                                    | pos             | MS <sup>1</sup>           | [M+H] <sup>+</sup>                |
| TAG             | 17:0-17:1-17:0 D5 TG                                                                                                                                    | pos             | MS <sup>1</sup>           | [M+NH <sub>4</sub> ] <sup>+</sup> |
| CE              | 17:0 cholesteryl ester                                                                                                                                  | pos             | MS <sup>1</sup>           | [M+NH <sub>4</sub> ] <sup>+</sup> |
| DAG             | 18:0 Diether PC + 4ME 16:0 Diether PE + 17:0 SM (d18:1/17:0) + 17:0-17:1-17:0 D5 TG + C17 Ceramide (d18:1/17:0) + 17:0 Lyso PC + 17:0 cholesteryl ester | pos             | MS <sup>1</sup>           | [M+NH <sub>4</sub> ] <sup>+</sup> |
| Cer             | C17 Ceramide (d18:1/17:0)                                                                                                                               | pos             | MS <sup>2</sup>           | [M-FA] <sup>+</sup>               |
| Cholesterol     | Chol-D7                                                                                                                                                 | pos             | MS <sup>2</sup> - Acetate | [M-H <sub>2</sub> O] <sup>+</sup> |

<sup>a</sup> The responses of the respective ion species were divided by the intensity of the respective standard (or sum of intensities of given standards) multiplied by the amount of the respective standards (sum of amounts).
